1 **Title: A high resolution atlas of gene expression in the domestic sheep (*Ovis***  
2 ***aries*)**

3

4 Clark EL<sup>1</sup><sup>o\*</sup>, Bush SJ<sup>1</sup><sup>o</sup>, McCulloch MEB<sup>1</sup>, Farquhar IL<sup>1</sup><sup>‡</sup>, Young R<sup>1</sup>, Lefevre L<sup>1</sup>, Pridans C<sup>1</sup>,  
5 Tsang HG<sup>1</sup>, Wu C<sup>2</sup>, Afrasiabi C<sup>2</sup>, Watson M<sup>1</sup>, Whitelaw CB<sup>1</sup>, Freeman TC<sup>1</sup>, Summers KM<sup>1</sup>,  
6 Archibald AL<sup>1</sup> and Hume DA<sup>1</sup>

7

8 <sup>1</sup>The Roslin Institute and Royal (Dick) School of Veterinary Studies, University of  
9 Edinburgh, Easter Bush Campus, Edinburgh, Midlothian, EH25 9RG.

10 <sup>2</sup>Department of Integrative and Computational Biology, The Scripps Research Institute,  
11 10550 North Torrey Pines Road, La Jolla, CA 92037.

12 <sup>‡</sup>Current Address: Centre for Synthetic and Systems Biology, CH Waddington Building, Max  
13 Borne Crescent, Kings Buildings, University of Edinburgh, EH9 3BF.

14 <sup>o</sup> These two authors contributed equally to the work.

15 \* Corresponding Author: [emily.clark@roslin.ed.ac.uk](mailto:emily.clark@roslin.ed.ac.uk)

16

17

18

19

20

21

22

23

24

25

26 **Abstract**

27

28 Sheep are a key source of meat, milk and fibre for the global livestock sector, and an  
29 important biomedical model. Global analysis of gene expression across multiple tissues has  
30 aided genome annotation and supported functional annotation of mammalian genes. We  
31 present a large-scale RNA-Seq dataset representing all the major organ systems from adult  
32 sheep and from several juvenile, neonatal and prenatal developmental time points. The *Ovis*  
33 *aries* reference genome (Oar v3.1) includes 27,504 genes (20,921 protein coding), of which  
34 25,350 (19,921 protein coding) had detectable expression in at least one tissue in the sheep  
35 gene expression atlas dataset. Network-based cluster analysis of this dataset grouped genes  
36 according to their expression pattern. The principle of ‘guilt by association’ was used to infer  
37 the function of uncharacterised genes from their co-expression with genes of known function.  
38 We describe the overall transcriptional signatures present in the sheep gene expression atlas  
39 and assign those signatures, where possible, to specific cell populations or pathways. The  
40 findings are related to innate immunity by focusing on clusters with an immune signature,  
41 and to the advantages of cross-breeding by examining the patterns of genes exhibiting the  
42 greatest expression differences between purebred and crossbred animals. This high-resolution  
43 gene expression atlas for sheep is, to our knowledge, the largest transcriptomic dataset from  
44 any livestock species to date. It provides a resource to improve the annotation of the current  
45 reference genome for sheep, presenting a model transcriptome for ruminants and insight into  
46 gene, cell and tissue function at multiple developmental stages.

47

48

49

50

## 51 **Author Summary**

52

53 Sheep are ruminant mammals kept as livestock for the production of meat, milk and wool in  
54 agricultural industries across the globe. Genetic and genomic information can be used to  
55 improve production traits such as disease resilience. The sheep genome is however missing  
56 important information relating to gene function and many genes, which may be important for  
57 productivity, have no informative gene name. This can be remedied using RNA-Sequencing  
58 to generate a global expression profile of all protein-coding genes, across multiple organ  
59 systems and developmental stages. Clustering genes based on their expression profile across  
60 tissues and cells allows us to assign function to those genes. If for example a gene with no  
61 informative gene name is expressed in macrophages and is found within a cluster of known  
62 macrophage related genes it is likely to be involved in macrophage function and play a role in  
63 innate immunity. This information improves the quality of the reference genome and  
64 provides insight into biological processes underlying the complex traits that influence the  
65 productivity of sheep and other livestock species.

66

## 67 **Introduction**

68 Sheep (*Ovis aries*) represent an important livestock species globally and are a key  
69 source of animal products including meat, milk and fibre. They remain an essential part of  
70 the rural economy in many developed countries and are central to sustainable agriculture in  
71 developing countries. They are also an important source of greenhouse gases [1]. Although  
72 genetic improvement is often considered to have been less effective in sheep than in the dairy  
73 cattle, pig and poultry sectors, advanced genomics-enabled breeding schemes are being  
74 implemented in New Zealand and elsewhere [2-4]. A better understanding of functional  
75 sequences, including transcribed sequences and the transcriptional control of complex traits

76 such as disease resilience, reproductive capacity, feed conversion efficiency and welfare, will  
77 enable further improvements in productivity with concomitant reductions in environmental  
78 impact.

79 RNA-Sequencing (RNA-Seq) has transformed the analysis of gene expression from  
80 the single-gene to the genome-wide scale allowing visualisation of the transcriptome and re-  
81 defining how we view the transcriptional control of complex traits (reviewed in [5]). Large-  
82 scale gene expression atlas projects have defined the mammalian transcriptome in multiple  
83 species, initially using microarrays [6-9] and more recently by the sequencing of full length  
84 transcripts or of 5' ends, for example in the horse [10], and in human and mouse by the  
85 FANTOM 5 consortium [11-13], ENCODE project [14] and Genotype-Tissue Expression  
86 (GTEx) Consortium [15].

87 These efforts have focused mainly on mice and humans, for which there are high  
88 quality richly annotated reference genome sequences available as a frame of reference for the  
89 identification and analysis of transcribed sequences. Draft reference genome sequences have  
90 been established for the major livestock species (chicken, pig, sheep, goat and cattle) over the  
91 past decade, yet it is only with the recent deployment of long read sequencing technology that  
92 the contiguity of the reference genome sequences for these species has improved. This is  
93 exemplified by the recent goat genome assembly [16, 17]. In these species there are still  
94 many predicted protein-coding and non-coding genes for which the gene model is incorrect  
95 or incomplete, or where there is no informative functional annotation. For example, in the  
96 current sheep reference genome, Oar v3.1 (Ensembl release 87)  
97 ([http://www.ensembl.org/Ovis\\_aries/Info/Index](http://www.ensembl.org/Ovis_aries/Info/Index)), 30% of protein-coding genes are identified  
98 with an Ensembl placeholder ID [18]. Given the high proportion of such unannotated genes  
99 many are likely to be involved in important functions. Large-scale RNA-Seq gene  
100 expression datasets can be utilised to understand the underlying biology and annotate and

101 assign function to such unannotated genes [19]. With sufficiently large datasets, genes form  
102 co-expression clusters, which can either be generic, associated with a given pathway or be  
103 cell-/tissue- specific. This information can then be used to associate a function with genes co-  
104 expressed in the same cluster, a logic known as the ‘guilt by association principle’ [20].  
105 Detailed knowledge of the expression pattern can provide a valuable window on likely gene  
106 function, as demonstrated in pig [6], sheep [18, 21], human and mouse [8, 9, 22, 23].

107         A high quality well-annotated reference genome is an exceptionally valuable resource  
108 for any livestock species, providing a comparative sequence dataset and a representative set  
109 of gene models. The International Sheep Genomics Consortium (ISGC) released a high  
110 quality draft sheep genome sequence (Oar v3.1) in 2014 [18]. Included in the sheep genome  
111 paper were 83 RNA-Seq libraries from a Texel gestating adult female, 16 day embryo, 8  
112 month old lamb and an adult ram. This Texel RNA-Seq transcriptome significantly improved  
113 the annotation of Oar v3.1 and identified numerous genes exhibiting changes in copy number  
114 and tissue specific expression [18]. To build on this resource and further improve the  
115 functional annotation of Oar v3.1 we have generated a much larger high-resolution  
116 transcriptional atlas from a comprehensive set of tissues and cell types from multiple  
117 individuals of an outbred cross of two economically important sheep breeds. To maximize  
118 heterozygosity we deliberately chose a cross of disparate breeds, the Texel, which is used as  
119 a terminal sire as it is highly muscled in some cases because it has a myostatin variant linked  
120 to double-muscling and meat quality [24], and the Scottish Blackface, a breed selected for  
121 robustness on marginal upland grazing [25].

122         The sheep gene expression atlas dataset presented here is the largest of its kind from  
123 any livestock species to date and includes RNA-Seq libraries from tissues and cells  
124 representing all the major organ systems from adult sheep and from several juvenile, neonatal  
125 and prenatal developmental time points. Because the tissues were obtained from multiple

126 healthy young adult animals, the atlas may also aid understanding of the function of  
127 orthologous human genes. Our aim was to provide a model transcriptome for ruminants and  
128 give insight into gene, cell and tissue function and the molecular basis of complex traits. To  
129 illustrate the value of the resource, we provide detailed examination of genes implicated in  
130 innate immunity and the advantages of cross breeding and provide putative gene names for  
131 hundreds of the unannotated genes in Oar v3.1. The entire data set is available in a number of  
132 formats to support the research community and will contribute to the Functional Annotation  
133 of Animal Genomes (FAANG) project [26, 27].

134

## 135 **Results and Discussion**

### 136 **Scope of Sheep Gene Expression Atlas Dataset**

137 This sheep gene expression atlas dataset expands on the RNA-Seq datasets already  
138 available for sheep, merging a new set of 429 RNA-Seq libraries from the Scottish Blackface  
139 x Texel cross (BFxT) with 83 existing libraries from Texel [18]. Details of the new BFxT  
140 libraries generated for the sheep gene expression atlas, including the developmental stages  
141 sampled, tissue/cell types and sex of the animals are summarised in Table 1. These samples  
142 can be grouped into 4 subsets (“Core Atlas”, “GI Tract Time Series”, “Early Development”  
143 and “Maternal Reproductive Time Series”). The animals used to generate the four subsets of  
144 samples are detailed in S1 Table.

145

146 **Table 1: Details of the tissues and cell types sequenced to generate the BFxT RNA-Seq**  
147 **dataset for the sheep gene expression atlas.**

148

| Subset     | Tissue Type                   | Library Type  | Sequencing Depth       | Total Number of Libraries | Number of Individuals     |
|------------|-------------------------------|---------------|------------------------|---------------------------|---------------------------|
| Core Atlas | Liver, spleen, ovary, testes, | Total RNA-Seq | >100 million reads per | 60 (10 per individual)    | 3 adult males and 3 adult |

|                                                          |                                                                                                           |                                |                               |                                   |                                                      |
|----------------------------------------------------------|-----------------------------------------------------------------------------------------------------------|--------------------------------|-------------------------------|-----------------------------------|------------------------------------------------------|
|                                                          | hippocampus, kidney medulla, bicep muscle, reticulum, ileum, thymus, left ventricle                       |                                | sample                        |                                   | females                                              |
| Core Atlas                                               | GI tract, reproductive tract, brain, endocrine, cardiovascular, lymphatic, musculo-skeletal, immune cells | mRNA-Seq                       | >25 million reads per sample  | 248 (~45 per individual)          | 3 adult males and 3 adult females                    |
| LPS Time Course (Core Atlas)                             | BMDM 0h (-LPS) and 7h (+LPS)                                                                              | Total RNA-Seq                  | >100 million reads per sample | 12 (2 time points per individual) | 3 adult males and 3 adult females                    |
| LPS Time Course (Core Atlas)                             | BMDM 2h, 4h, 24h post LPS treatment                                                                       | mRNA-Seq                       | >25 million reads per sample  | 32 (3 time points per individual) | 3 adult males and 3 adult females                    |
| GI Tract Time Series                                     | Gastro-intestinal tract                                                                                   | mRNA-Seq                       | >25 million reads per sample  | 90 (10 tissues per individual)    | 9 lambs (3 at birth, 3 at one week and 3 at 8 weeks) |
| Early Development (blastocysts)                          | Day 7 blastocysts (3 pools of 8)                                                                          | Nu Gen Single Cell Ovation Kit | >66 million reads per sample  | 3                                 | 3 pools                                              |
| Early Development (day 23)                               | Day 23 whole embryos                                                                                      | Total RNA-Seq                  | >100 million reads per sample | 3                                 | 3                                                    |
| Early Development (day 35)                               | Liver, brain, embryonic fibroblasts                                                                       | mRNA-Seq                       | >25 million reads per sample  | 7                                 | 3 embryos (two female and one male)                  |
| Early Development (day 100)                              | Liver, ovary                                                                                              | mRNA-Seq                       | >25 million reads per sample  | 5                                 | 3 female (liver)<br>2 female (ovary)                 |
| Maternal Reproductive Time Series (days, 23, 35 and 100) | Placenta and ovary                                                                                        | mRNA-Seq                       | >25 million reads per sample  | 12                                | 2 females per time point                             |

149 Tissues and cells were chosen to cover all major organ systems. All libraries were Illumina  
 150 125bp paired end stranded libraries. See S2 Table for a detailed list of the tissues and cell  
 151 types sequenced.

152

153 The “Core Atlas” subset was generated using six adult virgin sheep, approximately 2  
 154 years of age. Tissue samples were collected from all major organ systems from 3 males and 3  
 155 females to ensure, wherever possible, there were biological replicates from each sex to

156 support an analysis of sex-specific gene expression. In addition, five cell types were sampled,  
157 including peripheral blood mononuclear cells (PBMCs) and blood leukocytes. Since  
158 macrophages are known to be a highly complex source of novel mRNAs [28], and were not  
159 sampled previously, three types of macrophage (+/- stimulation with lipopolysaccharide  
160 (LPS)) were included.

161 For the “GI Tract Time Series” subset of samples we focused on 10 regions of the  
162 gastro-intestinal (GI) tract, immediately at birth prior to first feed, at one week and at 8 weeks  
163 of age. These time points aimed to capture the transition from milk-feeding to rumination.  
164 Embryonic time points were chosen, at days 23, 35 and 100, to detect transcription in the  
165 liver, ovary and brain in “Early Development”. Parallel time points were included for  
166 placenta and ovary samples from gestating BFXT ewes, comprising the “Maternal  
167 Reproductive Time Series” subset. Finally, 3 pools of eight day 7 blastocysts were included  
168 to measure transcription pre-implantation and these were also included in the “Early  
169 Development” subset.

170 A detailed list of all tissues and cell types included in each subset of samples can be  
171 found in S2 Table. Tissues and cell types were chosen to give as comprehensive a set of  
172 organ systems as possible and include those tissues relevant for phenotypic traits such as  
173 muscle growth and innate immunity.

174

### 175 **Sequencing Depth and Coverage**

176 Approximately  $37 \times 10^9$  sequenced reads were generated from the BFXT libraries,  
177 generating approximately  $26 \times 10^9$  alignments in total. The raw number of reads and  
178 percentage of alignable reads per sample are included in S3 Table. For each tissue a set of  
179 expression estimates, as transcripts per million (TPM), were obtained using the high speed  
180 transcript quantification tool Kallisto [29]. Kallisto is a new transcriptome-based



181 quantification tool that avoids the considerable bias introduced by the genome alignment step  
182 [30]. Gene level expression atlases are available as S1 Dataset and, with expression estimates  
183 averaged per tissue per developmental stage, S2 Dataset. The data were corrected for library  
184 type (as we described in [31] and summarised in S1 Methods). We used Principal Component  
185 Analysis (PCA) pre- and post-correction (S1 Fig) for library type to ensure the correction was  
186 satisfactory. Hierarchical clustering of the samples is included in (Fig 1) and illustrates both  
187 the large diversity and logical clustering of samples of samples included in the dataset.

188 The *O. aries* reference genome (Oar v3.1) includes 27,504 loci that are transcribed  
189 (20,921 protein coding), of which 25,350 (19,921 protein coding) (97%) were detectable with  
190 expression of TPM >1, in at least one tissue from at least one individual, in the sheep gene  
191 expression atlas dataset, demonstrating the depth and scope of this dataset. The proportion of  
192 transcripts with detectable expression, after each ‘pass’ with Kallisto (See Materials and  
193 Methods), is presented in Table 2. Only 3% (561) of transcripts from Oar v3.1 (S4 Table) did  
194 not meet the minimum detection threshold of TPM > 1 in at least one tissue and therefore  
195 were not detected in the sheep atlas dataset. In a minority of cases, transcripts were missing  
196 because they were highly specific to a tissue or cell which was not sampled, such as  
197 odontoblasts (which uniquely produce tooth dentin, mediated by DSPP (dentin  
198 sialophosphoprotein) [32]). We also did not include any samples taken from the eye which  
199 expresses multiple unique proteins e.g., the lens-specific enzyme LGSN (lengsin) [33]. The  
200 majority (77%) of the genes not detected in the sheep atlas were unannotated, with no  
201 assigned gene name. A small number of these genes (36) lack sequence conservation and  
202 coding potential and so are potentially spurious models (S4 Table).

203

204 **Table 2: The number and percentage of Oar v3.1 protein coding and non-coding genes,**  
205 **with average TPM across all animals > 1 in at least one tissue, in both the BFXt dataset**

206 **after the Kallisto first and second pass, and after incorporating the existing Texel**  
 207 **dataset.**

208

| RNA-Seq data used:   | Scottish Blackface x Texel Libraries Only |                                     |                                |                                     |                                | Including the existing Texel dataset |                                |
|----------------------|-------------------------------------------|-------------------------------------|--------------------------------|-------------------------------------|--------------------------------|--------------------------------------|--------------------------------|
| Kallisto index:      | First-Pass                                |                                     |                                | Second-Pass (restricted)            |                                | Second-Pass (restricted)             |                                |
| Gene type            | No. in reference annotation (Oar v3.1)    | No. of genes of this type expressed | % genes of this type expressed | No. of genes of this type expressed | % genes of this type expressed | No. of genes of this type expressed  | % genes of this type expressed |
| lincRNA              | 1858                                      | 1548                                | 83.32                          | 0                                   | 0                              | 0                                    | 0                              |
| miRNA                | 1305                                      | 1242                                | 95.17                          | 0                                   | 0                              | 0                                    | 0                              |
| misc RNA             | 361                                       | 310                                 | 85.87                          | 0                                   | 0                              | 0                                    | 0                              |
| MT rRNA              | 2                                         | 2                                   | 100                            | 0                                   | 0                              | 0                                    | 0                              |
| MT tRNA              | 22                                        | 19                                  | 86.36                          | 0                                   | 0                              | 0                                    | 0                              |
| processed pseudogene | 43                                        | 31                                  | 72.09                          | 35                                  | 81.40                          | 38                                   | 88.37                          |
| protein-coding       | 20921                                     | 19921                               | 95.22                          | 20189                               | 96.50                          | 20359                                | 97.31                          |
| pseudogene           | 247                                       | 172                                 | 69.64                          | 189                                 | 76.52                          | 201                                  | 81.38                          |
| rRNA                 | 305                                       | 272                                 | 89.18                          | 0                                   | 0                              | 0                                    | 0                              |
| snoRNA               | 756                                       | 717                                 | 94.84                          | 0                                   | 0                              | 0                                    | 0                              |
| snRNA                | 1234                                      | 1116                                | 90.44                          | 0                                   | 0                              | 0                                    | 0                              |
| <b>Sum</b>           | <b>27054</b>                              | <b>25350</b>                        |                                | <b>20413</b>                        |                                | <b>20598</b>                         |                                |

209 'BFxT data' refers to the present study; 'Texel data' is obtained from [18]. The 'first pass'  
 210 Kallisto index contains the known *Ovis aries* v3.1 cDNAs for both protein-coding and non-  
 211 protein coding transcripts. The 'second pass' Kallisto index is a filtered version of the former,  
 212 that (a) restricts the RNA space to protein-coding genes, pseudogenes, and processed  
 213 pseudogenes (so that expression within an equivalent space will be quantified, irrespective of  
 214 experimental protocol), (b) omits genes that had no detectable expression across all BFxT

215 samples, and (c) includes novel transcript reconstructions further to the *de novo* assembly of  
216 unmapped reads.

217

## 218 **Gene Annotation**

219 In the Oar v3.1 annotation, 6217 (~30%) of the protein coding genes lack an  
220 informative gene name. Whilst the Ensembl annotation will often identify homologues of a  
221 sheep gene model, the automated annotation pipeline used is conservative in its assignment  
222 of gene names and symbols. Using an annotation pipeline (described in S1 Methods and  
223 illustrated in S5 Table) we were able to utilise the sheep gene expression atlas dataset to  
224 annotate >1000 of the previously unannotated protein coding genes in Oar v3.1 (S6 Table).  
225 These genes were annotated by reference to the NCBI non-redundant (nr) peptide database  
226 v77 [34] and assigned a quality category based on reciprocal percentage identity, if any, to  
227 one of 9 known ruminant proteomes (S7 Table). A short-list containing a conservative set of  
228 gene annotations, to HGNC (HUGO Gene Nomenclature Committee) gene symbols, is  
229 included in S8 Table. Many of these genes are found in syntenic regions, and are  
230 also supported by the up- and downstream conservation of genes in a related genome, cattle  
231 (*Bos taurus* annotation UMD 3.1). S9 Table contains the full list of genes annotated using  
232 this pipeline. Many unannotated genes can be associated with a gene description, but not  
233 necessarily an HGNC symbol; these are also listed in S10 Table. We manually validated the  
234 assigned gene names on this longer list using network cluster analysis and the “guilt by  
235 association” principle.

236

## 237 **Network Cluster Analysis**

238 Network cluster analysis of the sheep gene expression atlas was performed using  
239 Miru (Kajeka Ltd, Edinburgh UK), a tool for the visualisation and analysis of network graphs

240 from big data [35-37]. The the atlas of unaveraged TPM estimates, available as S1 Dataset,  
241 were used for the network cluster analysis. The three blastocyst samples were removed from  
242 the network cluster analysis as they were generated using a library preparation method which  
243 was not corrected for and created a significant effect of library type. With a Pearson  
244 correlation co-efficient threshold of  $r=0.75$  and MCL (Markov Cluster Algorithm [38])  
245 inflation value of 2.2, the gene-to-gene network comprised 15,129 nodes (transcripts) and  
246 811,213 edges (correlations above the threshold value). This clustering excludes >30% of  
247 detected transcripts, most of which had idiosyncratic expression profiles. One of the major  
248 sources of unique expression patterns is the use of distinct promoters in different cell types.  
249 The transcription factor *MITF* (Melanogenesis Associated Transcription Factor), for  
250 example, does not cluster with any other transcripts in sheep and is known in humans to have  
251 at least 7 distinct tissue-specific promoters in different cell types, including macrophages,  
252 melanocytes, kidney, heart and retinal pigment epithelium [13].

253 The resultant correlation network (Fig 2) was very large and highly structured  
254 comprising of 309 clusters ranging in size. Genes found in each cluster are listed in S11  
255 Table and clusters 1 to 50 (numbered in order of size; cluster 1 being made up of 1199 genes)  
256 were annotated by hand and assigned a broad functional 'class' and 'sub-class' (Table 3).  
257 Functional classes were assigned based on GO term enrichment [39] for molecular function  
258 and biological process (S12 Table) and gene expression pattern, as well as comparison with  
259 functional groupings observed in the pig expression atlas [6]. Fig 3 shows a network graph  
260 with the nodes collapsed, and the largest clusters numbered 1 to 30, to illustrate the relative  
261 number of genes in each cluster and their functional class.

262

263 **Table 3: Tissue/cell/pathway association of the largest 50 network clusters in the sheep**  
264 **gene expression atlas dataset.**

| Cluster ID | Number of Transcripts | Profile Description                                  | Class             | Sub-Class                    |
|------------|-----------------------|------------------------------------------------------|-------------------|------------------------------|
| 1          | 1199                  | General                                              | House Keeping     | House Keeping (1)            |
| 2          | 987                   | Brain                                                | CNS               | CNS                          |
| 3          | 658                   | Testes – Adult                                       | Reproduction      | Gamete Production            |
| 4          | 585                   | General                                              | House Keeping     | House Keeping (2)            |
| 5          | 351                   | Macrophages                                          | Immune            | Macrophages                  |
| 6          | 350                   | Fallopian Tube > Testes                              | Cilia             | Motile Cilia                 |
| 7          | 284                   | Fetal Ovary > Adult Testes                           | Early Development | Reproduction                 |
| 8          | 276                   | Many Tissues - Highly Variable                       | Pathway           | Cell Cycle                   |
| 9          | 265                   | Fetal Brain > Adult Brain                            | CNS               | CNS                          |
| 10         | 247                   | Skeletal Muscle > Oesophageal Muscle                 | Musculature       | Skeletal Muscle              |
| 11         | 219                   | Lymph Nodes > Blood > Not Macrophages                | Immune            | T-Cell and B-Cell            |
| 12         | 215                   | Thymus > Salivary Gland                              | Immune            | T-Cell                       |
| 13         | 186                   | Fore-Stomachs > Tonsil > Skin                        | GI Tract          | Ruminal Epithelium           |
| 14         | 183                   | Kidney Cortex > Liver                                | Renal             | Kidney Cortex                |
| 15         | 182                   | General but not even - highest in muscle             | Pathway           | Oxidative Phosphorylation    |
| 16         | 158                   | Epididymis > Vas Deferens                            | Reproduction      | Male                         |
| 17         | 153                   | Liver                                                | Liver             | Liver (Hepatocytes)          |
| 18         | 145                   | Peyer's Patch, Ileum, Lymph Nodes, Blood             | Immune            | T-Cell and B-Cell            |
| 19         | 134                   | Placenta                                             | Gestation         | Placental Function           |
| 20         | 119                   | Epididymis > Testes > Vas Deferens                   | Reproduction      | Male                         |
| 21         | 115                   | General but not even                                 | Pathway           | Ribosomal                    |
| 22         | 102                   | Adrenal Gland                                        | Endocrine         | Steroid Hormone Biosynthesis |
| 23         | 102                   | Placenta                                             | Gestation         | Placental Function           |
| 24         | 98                    | Liver > Small Intestine                              | Liver             | Liver (GI Tract)             |
| 25         | 96                    | Fetal Liver                                          | Liver             | Developing Liver             |
| 26         | 92                    | Small Intestine > Large Intestine                    | GI tract          | GI Tract                     |
| 27         | 90                    | Pituitary Gland                                      | Endocrine         | Hormone Synthesis            |
| 28         | 85                    | General highest in reproductive tissues and brain    | Cilia             | Primary Cilia                |
| 29         | 77                    | Heart                                                | Musculature       | Cardiac Muscle               |
| 30         | 75                    | Thyroid                                              | Endocrine         | Thyroxine Synthesis          |
| 31         | 73                    | Peyers Patch, Ileum, Lymph Nodes, Blood, Macrophages | Immune            | T-Cell and B-Cell            |
| 32         | 69                    | Salivary Gland, Lymph Node, Blood, Small Intestine   | Immune            | T-Cell and B-Cell            |
| 33         | 68                    | Fore-Stomachs Adult - Not Neonates > AMs             | GI Tract          | Immune                       |
| 34         | 65                    | Small Intestine > Large Intestine                    | GI tract          | GI Tract                     |
| 35         | 61                    | General - highest in brain                           | House Keeping     | House Keeping (3)            |

|    |    |                                     |                |                                |
|----|----|-------------------------------------|----------------|--------------------------------|
| 36 | 58 | Heart Valves                        | Cardiovascular | Extra Cellular Matrix          |
| 37 | 58 | General - highest in blood          | House Keeping  | House Keeping (4)              |
| 38 | 56 | General - highest in fetal brain    | House Keeping  | House Keeping (5)              |
| 39 | 50 | GI Tract - highest in reticulum     | GI Tract       | GI Tract                       |
| 40 | 49 | General - highest in testes         | House Keeping  | House Keeping (6)              |
| 41 | 49 | General - highest in ovary          | House Keeping  | House Keeping (7)              |
| 42 | 47 | General - highest in brain          | House Keeping  | House Keeping (8)              |
| 43 | 45 | Fore-Stomachs > Tonsil > Skin       | GI Tract       | Ruminal Epithelium             |
| 44 | 45 | General - highest in testes         | House Keeping  | House Keeping (9)              |
| 45 | 44 | Macrophage (BMDM + LPS)             | Immune         | Macrophages (LPS Response TNF) |
| 46 | 44 | Blood, Lymph Nodes                  | Immune         | Blood                          |
| 47 | 42 | Large Intestine                     | GI Tract       | GI Tract                       |
| 48 | 42 | General                             | Pathway        | Histones                       |
| 49 | 41 | Reticulum and Rumen - very variable | GI Tract       | Reticulum/Rumen                |
| 50 | 36 | Adrenal Gland Medulla               | Endocrine      | Steroid Hormone Biosynthesis   |

265

266 The majority of co-expression clusters included genes exhibiting a specific cell/tissue  
267 expression pattern (Fig 4A). There were a few exceptions, including the largest cluster  
268 (cluster 1), which contained ubiquitously expressed ‘house-keeping’ genes, encoding proteins  
269 that are functional in all cell types. The high proportion of unannotated genes (24% of the  
270 1199 genes) in cluster 1 may reflect the focus of functional genomics on genes exhibiting  
271 tissue specific expression, and inferred function in differentiation, leaving those with a house-  
272 keeping function uncharacterised [40]. With a few exceptions, the remaining co-expression  
273 clusters were comprised of genes exhibiting either expression only in a distinct tissue or cell  
274 type expression pattern e.g. macrophages (cluster 5) (Fig 4B (i)) and fetal ovary (cluster 7)  
275 (Fig 4B (ii)), or a broader expression pattern associated with a cellular process e.g. oxidative  
276 phosphorylation (cluster 15) (Fig 4B (iii)). Some co-expression is shared between two or  
277 more organ systems, associated with known shared functions. For example, cluster 15,  
278 exhibiting high expression in liver and kidney cortex, is enriched for expression of genes  
279 relating to the oxidation-reduction process, transmembrane transport, monocarboxylic acid

280 catabolic process and fatty acid oxidation (S13 Table). It includes numerous genes encoding  
281 enzymes involved in amino acid catabolism (e.g. *AGXT*, *AGXT2*, *ASPDH*, *ACY1*, *EHHADH*,  
282 *DPYD*, *DAO*, *DDO*, *HAO1*, and *HPD*) and the rate-limiting enzymes of gluconeogenesis  
283 (*PCK1*, *PC*, *ALDOB* and *G6PC*). The contributions of kidney and liver to amino acid  
284 turnover and gluconeogenesis are well known in humans [41] and rodents [42]. These  
285 observations suggest that the shared catabolic pathways of liver and kidney cortex are largely  
286 conserved in sheep, but detailed curation of the genes in this cluster could provide further  
287 specific insights. Alanine aminotransferase (*ALTI* synonym *GPT1*), which generates alanine  
288 from the breakdown of amino acids in muscle and is transported to the liver for  
289 gluconeogenesis, is highly-expressed in muscle as expected. The glutaminase genes,  
290 required for the turnover of glutamine, are absent from tissue or cell type specific clusters;  
291 the liver-specific enzyme *GLS2* is also expressed in neuronal tissues, as it is in humans [43,  
292 44].

293 The tissue-specific expression patterns observed across clusters showed a high degree  
294 of similarity to those observed for pig [6], human and mouse [8, 9]. In some cases we were  
295 able to add functional detail to clusters of genes previously observed in pig and human. For  
296 example, genes within cluster 6 showed high expression in the fallopian tube and to a lesser  
297 extent the testes. Significantly enriched GO terms for cluster 6 included cilium ( $p=4.1 \times 10^{-8}$ ),  
298 microtubule motor activity ( $p=2.9 \times 10^{-11}$ ) and motile cilium ( $p=2.8 \times 10^{-19}$ ) suggesting the  
299 genes expressed in cluster 6 are likely to have a function related to motile cilia in sperm cells  
300 and the fallopian tube. Cluster 6 in the sheep atlas dataset corresponds to cluster 9 in the pig  
301 gene expression atlas [6]. Similarly, significantly enriched GO terms for genes in cluster 28  
302 included primary cilium ( $p=7.5 \times 10^{-21}$ ) and ciliary basal body ( $p=1.9 \times 10^{-12}$ ), indicating the  
303 genes in this cluster were associated with the function of primary cilia. Genes within this  
304 cluster showed a relatively wide expression pattern, with brain and reproductive tissues

305 exhibiting the highest expression. For both clusters associated with cilia function,  
306 significantly enriched GO terms also included cell-cycle related cellular processes and cell-  
307 cycle associated genes, supporting the link between cilia and the cell-cycle [45-47].

308

### 309 **Cellular Processes**

310 The genes within some clusters, rather than being linked to the function of a particular  
311 tissue or cell type, showed varying levels of expression across multiple tissues, suggesting  
312 their involvement in a universal cellular process (pathway). Significantly enriched GO terms  
313 for genes in cluster 8, for example, included ‘cell cycle checkpoint’ ( $p=1 \times 10^{-17}$ ) and ‘mitotic  
314 cell cycle’ ( $p < 1 \times 10^{-30}$ ). The variation in expression of these genes across tissues likely  
315 reflects variation in the proportion of mitotically active cells. In the same way, it is possible  
316 to extract a similar cluster from large cancer gene expression data sets, correlating with their  
317 proliferative index [48]. Expression of genes in cluster 15 ( $n=182$ ) was detectable in most  
318 ovine tissues and cells but with strongly-enriched expression in skeletal and cardiac muscle.  
319 The pig gene expression atlas [6] highlighted an oxidative phosphorylation cluster and a  
320 mitochondrial/tricarboxylic acid (TCA) cluster. This functional grouping is merged in cluster  
321 15. The majority of the transcripts in cluster 15 are present within the inventory of  
322 mitochondrial genes in humans and mice [49], but the reciprocal is not true since many other  
323 genes encoding proteins that locate to mitochondria were not found in cluster 15. Many  
324 mitochondrial proteins are unrelated to oxidative phosphorylation *per se*, and are enriched in  
325 other tissues including liver and kidney (including mitochondrial enzymes of amino acid and  
326 fatty acid catabolism, see above) and intestine.

327 Cluster 15 also contains several genes associated with myosin and the sarcoplasmic  
328 reticulum which may indicate some level of coordination of their function with the oxidative  
329 metabolism of glucose. The majority of genes in the corresponding cluster in pig [6] were



330 also present in this cluster with a few notable additions including dihydrolipoamide  
331 dehydrogenase (*DLD*), which encodes a member of the class-I pyridine nucleotide-disulfide  
332 oxidoreductase family, and carnitine acetyltransferase (*CRAT*), a key enzyme in the  
333 metabolic pathway in mitochondria [50]. We were able to assign gene names to the following  
334 genes associated with oxidative phosphorylation complex I in pig: *NDUFA9*  
335 (ENSOARG0000009435), *NDUFB1* (ENSOARG00000020197), *NUDFB8* (assigned to  
336 ENSOARG00000015378), and *NDUFC2* (ENSOARG0000006694). The gene name  
337 *PTGES2* (prostaglandin E2 synthase 2) was assigned to ENSOARG00000010878, a gene that  
338 was associated with fatty acid (long-chain) beta oxidation in pig [6] but previously  
339 unannotated in sheep. Similarly, we assigned the gene name *PDHB* (pyruvate dehydrogenase  
340 E1 component subunit beta), a member of the pyruvate dehydrogenase complex also  
341 previously unannotated in sheep, to ENSOARG00000012222. The inclusion of the PDH  
342 complex, as well as the mitochondrial pyruvate carriers *MPC1* and *MPC2*, in the muscle-  
343 enriched cluster 15 reflects the fact that glucose, giving rise to pyruvate, is the preferred fuel  
344 for oxidative metabolism in muscle [51].

345 By using comparative clustering information in the pig and the “guilt by association”  
346 principle we were able to assign with confidence gene names and putative function to the  
347 majority of unannotated genes in clusters 8 (cell-cycle) and 15 (oxidative phosphorylation)  
348 (S13 Table). Expression of cell cycle and metabolic genes has recently been shown to be  
349 positively correlated with dry matter intake, ruminal short chain fatty acid concentrations and  
350 methane production in sheep [52]. In the same study a weak correlation between lipid/oxo-  
351 acid metabolism genes and methane yield was also identified suggesting that the newly  
352 unannotated genes in these clusters are likely to be relevant in addressing methane production  
353 in ruminants [52].

354

## 355 **The GI Tract**

356 Stringent coexpression clustering requires that each transcript is quantified in a  
357 sufficiently large number of different states to establish a strong correlation with all other  
358 transcripts with which it shares coordinated transcription and, by implication, a shared  
359 function or pathway. The impact of this approach was evident from the pig gene expression  
360 atlas [6] which was effective at dissecting region-specific gene expression in the GI tract. We  
361 have generated a comparable dataset for sheep. In ruminants, the rumen, reticulum and  
362 omasum are covered exclusively with stratified squamous epithelium similar to that observed  
363 in the tonsil [18, 21]. Each of these organs has a very distinctive mucosal structure, which  
364 varies according to region sampled [53]. A network cluster analysis of regions of the GI tract  
365 from sheep has been published [21] using the Texel RNA-Seq dataset [18]. These co-  
366 expression clusters are broken up somewhat in this larger atlas, because many of the genes  
367 that are region-specific in the GI tract are also expressed elsewhere. We have, in addition,  
368 expanded the available dataset for the GI tract to include samples from neonatal and juvenile  
369 lambs.

370 The postnatal development of the sheep GI tract is of particular interest because of the  
371 pre-ruminant to ruminant transition, which occurs over 8 weeks from birth. Genes in cluster  
372 33 showed low levels of expression in neonatal lambs and a gradual increase into adulthood.  
373 Enriched GO terms for this cluster include regulation of interleukin 6 (IL6) production  
374 ( $p=0.0016$ ) and keratinocyte differentiation ( $p=1.7\times 10^{-8}$ ) (S12 Table). The cluster includes  
375 genes such as *HMGCS2*, *HMGCL* and *BDHI*, required for ketogenesis, an essential function  
376 of rumen metabolism, as well as *CAI* (carbonic anhydrase 1), implicated in the rumen-  
377 specific uptake of short chain fatty acids. The cluster does not contain any of the solute  
378 carriers implicated in nutrient uptake in the rumen, suggesting that these are more widely-  
379 expressed and/or regulated from multiple promoters [21]. The only carrier that is rumen-

380 enriched is *SLC9A3* (also known as *NHE3*), the key Na-H antiporter previously implicated in  
381 rumen sodium transport in both sheep and cattle [54]. Other genes in cluster 33, for example,  
382 *IL36A* and *IL36B*, for example, are thought to influence skin inflammatory response by  
383 acting on keratinocytes and macrophages and indirectly on T-lymphocytes to drive tissue  
384 infiltration, cell maturation and cell proliferation [55]. Many of these genes might also be part  
385 of the acute phase immune response, by regulating production of key cytokines such as *IL-6*  
386 and thus mediating activation of the NF- $\kappa$ B signaling pathways. Nuclear factor (NF)- $\kappa$ B and  
387 inhibitor of NF- $\kappa$ B kinase (IKK) proteins regulate innate- and adaptive-immune responses  
388 and inflammation (reviewed in [56]). Expression of many of these genes is likely to change  
389 as the immune system develops which we will describe in detail in a dedicated network  
390 cluster analysis of the GI tract developmental time series dataset. The genes in this cluster  
391 therefore appear to be involved both in the onset of rumination and in innate immunity  
392 (which could be associated with the population of the rumen microbiome).

393

#### 394 **Innate and Acquired Immunity**

395 Several clusters exhibited a strong immune signature. Clusters 11, 12, 18, 31 and 32,  
396 for example, contained genes with a strong T-lymphocyte signature [57] with high levels of  
397 expression in immune cell types and lymphoid tissues. Significantly enriched GO terms for  
398 cluster 12, for example, included T-cell differentiation ( $p=2.10 \times 10^{-11}$ ), immune response  
399 ( $p=0.00182$ ) and regulation of T-cell activation ( $p=0.00019$ ) (S12 Table). Manual gene  
400 annotation using Ensembl IDs within this cluster revealed the majority were T-cell receptors  
401 and T-cell surface glycoproteins (S14 Table). Interestingly, ENSOARG00000008993  
402 represents a gene with no orthologues to other species within the Ensembl database, but  
403 partial blast hits to T-lymphocyte surface antigen *Ly-9* in mouflon, goat, bison and buffalo in  
404 the NCBI database. The ‘true’ gene LY9, a member of the signalling lymphocyte activation

405 molecule (SLAM) family [58], is also unannotated in sheep and is assigned to  
406 ENSOARG00000008981, having multiple orthologues in other placental mammals. We have  
407 assigned ENSOARG00000008993 the gene name ‘LY9-like’ and the symbol *LY9L*, and  
408 suggest this transcript plays a role in T-lymphocyte pathogen recognition.

409         Other immune clusters exhibited a macrophage-specific signature, with subsets highly  
410 expressed in alveolar macrophages (AMs), monocyte derived macrophages (MDMs) and  
411 bone marrow derived macrophages (BMDMs) (cluster 5) and two defined clusters of genes  
412 induced in BMDMs stimulated with LPS (cluster 45 and 52). Known macrophage-specific  
413 surface markers, receptors and proinflammatory cytokines predominated in these clusters, in  
414 addition to numerous unannotated genes, with as yet undefined but probable immune  
415 function (S15 Table). For example, the *CD63* antigen, which mediates signal transduction  
416 events, was assigned to ENSOARG00000011313 and *BST2* (bone marrow stromal cell  
417 antigen 2), which is part of the interferon (IFN) alpha/beta signaling pathway, to  
418 ENSOARG00000016787. A third cluster of LPS-inducible genes in macrophages, cluster 64,  
419 contained a subset of the IFN-inducible antiviral effector genes, including *DDX58*, *IFIT1*,  
420 *IFIT2*, *MX1*, *MX2*, *RSAD2* and *XAF1*, which are induced in mouse and humans through the  
421 MyD88-independent *TLR4* signaling pathway via autocrine *IFNBI* signaling (reviewed in  
422 [59]). Many other components of this pathway identified in LPS-stimulated human  
423 macrophages [60] were either not annotated, or not clustered, and will be the target of  
424 detailed annotation efforts in the macrophage dataset.

425         Significantly enriched GO terms for the macrophage-specific cluster 5 included  
426 ‘response to lipopolysaccharide’ ( $p=7.2 \times 10^{-7}$ ), and ‘toll-like receptor signaling pathway’  
427 ( $p=3.2 \times 10^{-5}$ ). Many of the genes in this cluster are known components of the innate immune  
428 response in mammals. Interleukin 27 (*IL-27*), is a heterodimeric cytokine which has pro- and  
429 anti-inflammatory properties and a diverse effect on immune cells including the regulation of

430 T-helper cell development, stimulation of cytotoxic T-cell activity and suppression of T-cell  
431 proliferation [61]. *ADGRE1* encodes the protein EGF-like module-containing mucin-like  
432 hormone receptor-like 1 (*EMRI* also known as F4/80), a classic macrophage marker in mice  
433 [62]. Several genes in cluster 5 encode proteins exclusively expressed in macrophages and  
434 monocytes. One such gene, *CDI63*, encodes a member of the scavenger receptor cysteine-  
435 rich (SRCR) superfamily, which protects against oxidative damage by the clearance and  
436 endocytosis of hemoglobin/haptoglobin complexes by macrophages, and may also function  
437 as an innate immune sensor of bacteria [63].

438         One of the largest macrophage populations in the body occupies the lamina propria of  
439 the small and large intestine [64]. They are so numerous that the expression of macrophage-  
440 related genes can be detected within the total mRNA from intestine samples. As noted  
441 previously in the pig, one can infer from the expression profiles that certain genes that are  
442 highly-expressed in AMs are repressed in the intestinal wall [6]. We proposed that such  
443 genes, which included many c-type lectins and other receptors involved in bacterial  
444 recognition, were necessary for the elimination of inhaled pathogens, where such responses  
445 would be undesirable in the gut [6]. In the sheep, there was no large cohort of receptors that  
446 showed elevated expression in AMs relative to MDMs or BMDMs, and that were absent in  
447 the gut wall. Only a small cluster (115) of 13 genes showed that profile, including the  
448 phagocytic receptor *VSIG4* (CRiG), which is a known strong negative regulator of T-cell  
449 proliferation and *IL2* production [65] and *SCIMP*, recently identified as a novel adaptor of  
450 Toll-like receptor signaling that amplifies inflammatory cytokine production [66]. Six  
451 previously unannotated genes within this small cluster included the E3 ubiquitin ligase,  
452 *MARCH1*, and likely members of the paired immunoglobulin type receptor and SIGLEC  
453 families, which cannot be definitively assigned as orthologues.

454 Interestingly, macrophage colony-stimulating factor receptor (*CSF1R*), which  
455 controls the survival, proliferation and differentiation of macrophage lineage cells [67, 68],  
456 was not within the macrophage-specific cluster 5. Instead, *CSF1R* was in a small cluster  
457 (cluster 102) along with several other macrophage-specific genes including the C1Q  
458 complex. As in humans and mice [9, 12, 69], *CSF1R* was also expressed in sheep placenta.  
459 In humans and mice, placental (trophoblast) expression is directed from a separate promoter  
460 [11]. The small number of genes co-expressed with *CSF1R* are likely either co-expressed by  
461 trophoblasts as well as macrophages (as is C1Q in humans, see BioGPS  
462 (<http://biogps.org/dataset/GSE1133/geneatlas-u133a-gcrma/>) [9, 70]), or highly-expressed in  
463 placenta-associated macrophages.

464

#### 465 **Early Development and Reproduction**

466 The sheep gene expression atlas dataset includes multiple libraries from early  
467 developmental time points. Three of the larger clusters of co-expressed genes showed high  
468 levels of expression in the fetal ovary (cluster 7), fetal brain (cluster 9) and fetal liver (cluster  
469 25). ‘Testis-specific’ genes, particularly those involved in meiosis and gametogenesis, might  
470 also be expressed in the fetal ovary undergoing oogenesis [71, 72]. Our dataset from sheep  
471 appears to validate this hypothesis, since genes within cluster 7 exhibited higher levels of  
472 expression in the fetal ovary and to a lesser extent the testes. Several genes were expressed  
473 both in the testes and the fetal ovary including, testis and ovary specific PAZ domain  
474 containing 1 (*TOPAZ1*), which has been shown in sheep to be expressed in adult male testes  
475 and in females during fetal development with a peak during prophase I of meiosis [73]. Also,  
476 fetal and adult testis expressed 1 (*FATE1*), which is strongly expressed in spermatogonia,  
477 primary spermatocytes, and Sertoli cells in seminiferous tubules in mouse and humans [74].  
478 Significantly enriched GO terms for genes within cluster 7 included ‘female gonad

479 development' ( $p=4.9 \times 10^{-6}$ ), 'spermatogenesis' ( $p=4.6 \times 10^{-8}$ ) and 'growth factor activity'  
480 ( $p=5 \times 10^{-5}$ ) (S12 Table).

481         Several important genes for embryonic development were also co-expressed in cluster  
482 7. The germ-cell specific gene SRY-box 30 (*SOX30*) encodes a member of the SOX (SRY-  
483 related HMG-box) family of transcription factors involved in the regulation of embryonic  
484 development and in the determination of cell fate [75]. Growth differentiation factor 3  
485 (GDF3) encodes a protein required for normal ocular and skeletal development. Although it  
486 is a major stem cell marker gene [76], it has not previously been linked to germ cell  
487 expression. Similarly, POU class 5 homeobox 1 (*POU5F1*) encodes a transcription factor  
488 containing a POU homeodomain that controls embryonic development and stem cell  
489 pluripotency [76] but is also required for primordial germ cell survival [77]. The expression  
490 of these genes in tissues containing germ cells in sheep suggests they contribute to meiosis  
491 and cellular differentiation. These observations illustrate the utility of the sheep as a non-  
492 human model for the study of gametogenesis.

493         Cluster 7 also includes two related oocyte-derived members of the transforming  
494 growth factor- $\beta$  (*TGFBI*) superfamily, growth differentiation factor 9 (*GDF9*) and bone  
495 morphogenetic protein 15 (*BMP15*), which are essential for ovarian follicular growth and  
496 have been shown to regulate ovulation rate and influence fecundity in sheep [78, 79].  
497 Lambing rate is an important production trait in sheep and can vary between breeds based on  
498 single nucleotide polymorphism (SNP) mutations in key genes influencing ovulation rate  
499 (reviewed in [79, 80]). A number of the known fertility genes in sheep (reviewed in [81, 82]),  
500 such as the estrogen receptor (*ESR*) and the Lacaune gene (*B4GALNT2*) were not present in  
501 this cluster 7, which may be because they are not expressed in the ovary at the time points  
502 chosen for this study. Detailed analysis of the expression of key genes during early  
503 development in the fetal ovary in comparison with the ovary from the adult and gestating

504 ewes may provide additional insights.

505

### 506 **Sex Specific Differences in Gene Expression**

507 Sex-specific differences in gene expression have been reported in humans [83, 84]  
508 mice [85, 86], cattle [87, 88] and pigs [89, 90]. We examined male and female biased gene  
509 expression in the sheep atlas dataset by calculating the average TPM per sex for each gene  
510 and the female:male expression ratio (S3 Dataset). Twenty genes exhibited strongly sex  
511 biased expression (S16 Table); 13 were female-enriched and 7 were male-enriched. Among  
512 the male enriched genes was thyroid stimulating hormone beta (*TSHB*), which is expressed in  
513 thyrotroph cells in the pituitary gland and part of a neuro-endocrine signaling cascade in  
514 sheep [91]. Expression of *TSHB* in the pituitary gland of male BFXT was 3.6-fold higher than  
515 in female BFXT sheep. A similar sex bias has been observed in rats in which males exhibit  
516 significantly higher *TSHB* expression in the pituitary gland than females [92].

517 Other genes exhibiting similarly large sex specific fold-changes included keratin 36  
518 (*KRT36*) which was expressed 6.6-fold higher in the reticulum of male relative to female  
519 sheep and *VSIG1* (V-Set and immunoglobulin domain containing 1), which is required for the  
520 differentiation of glandular gastric epithelia [93]. *VSIG1* showed 4-fold greater expression in  
521 the female pylorus relative to the male. An unannotated gene ENSOARG00000020792  
522 exhibited large fold change in male biased expression in immune tissues including popliteal  
523 and prescapular lymph node, tonsil and Peyer's patch. This gene has a detectable blast hit to  
524 "immunoglobulin kappa-4 light chain variable region" and is a 1:1 orthologue with an  
525 unannotated gene in cattle, ENSBTAG00000045514, with  $\geq 70\%$  reciprocal percentage  
526 identity and conservation of synteny. The dN/dS for ENSOARG00000020792 suggests it is  
527 evolving rapidly (dN/dS > 2). Male-biased genes are known to evolve quickly, as are immune  
528 genes [94]. GO term enrichment for the set of genes with five-fold sex-biased expression in



529 at least one BFxT tissue (S17 Table) revealed that the genes enriched in females were  
530 predominately involved with the immune reponse while gene enriched in the male were  
531 broadly associated with muscle and connective tissue. This is likely to reflect inherent  
532 differences between the two sexes in allocation of resources towards growth or immunity.  
533 Genes exhibiting sex specific expression might therefore be relevant in sexual diamorphism  
534 in disease susceptibility for example, and warrant further investigation.

535

### 536 **Differential Expression of Genes between the Texel and BFxT**

537 The majority of commercially-produced livestock are a cross of two or more different  
538 production breeds with distinct desired traits [95]. For example, in the UK, the crossing of  
539 lighter upland sheep breeds with heavier lowland meat breeds optimises carcass quality,  
540 lambing rate, growth rate and survivability [95]. In developing countries, sustainable crossing  
541 of indigenous small ruminants with elite western breeds is one approach to improve  
542 productivity [96, 97]. An RNA-Seq dataset of this size from an outbred cross of two disparate  
543 sheep breeds provides an opportunity to investigate differential gene expression in a purebred  
544 parental line and crossbred animals. We compared gene expression across tissues in the F<sub>1</sub>  
545 crossbred (BFxT) animals (generated by crossing a Texel ram with a Scottish Blackface ewe;  
546 Fig 5A) with the purebred Texel animals included in the previous sheep gene expression atlas  
547 dataset [18].

548 A gene was considered differentially expressed (DE) between the purebred Texel and  
549 hybrid BFxT if (a) it was expressed at  $\geq 1$  TPM in both Texel and BFxT (considering TPM to  
550 be the mean of all replicates per tissue), (b) the fold change (ratio of BFxT TPM to Texel  
551 TPM) was  $\geq 2$  in  $\geq 25\%$  of the tissues in which expression was detected (stipulating no  
552 minimum number of tissues, but noting that 23 tissues are common to Texel and BFxT), and  
553 (c) the fold change was  $\geq 5$  in at least 1 tissue. Fold changes of all genes expressed at  $\geq 1$  TPM

554 in both breeds are given in S18 Table. The GO terms enriched in the set of DE genes (n=772)  
555 with higher expression in the BFxT than the Texel were predominantly related either to  
556 muscle or brain function (S19 Table). The top 20 genes showing the largest up-regulation  
557 (shown as absolute fold-change) in the BFxT relative to the purebred Texel sheep are  
558 illustrated in Fig 5B. Enriched molecular function GO terms for the set of genes differentially  
559 expressed between BFxT and Texel sheep include 'iron ion binding' ( $p=3.6 \times 10^{-4}$ ), and  
560 'cytoskeletal protein binding' ( $p=7.8 \times 10^{-6}$ ), biological process terms include 'cellular iron ion  
561 homeostasis' ( $p=6.3 \times 10^{-4}$ ) and cellular component terms include 'sarcomere' ( $p=6.6 \times 10^{-7}$ ) and  
562 'collagen trimer' ( $p=5.5 \times 10^{-7}$ ) (S19 Table).

563 Numerous genes with structural, motor and regulatory functions were highly  
564 expressed in BFxT compared to Texel bicep muscle, with approximately 5- to 18-fold  
565 expression increases for various members of the collagen (*COL1A1*, *COL1A2*, *COL3A1*) and  
566 myosin families (*MYH2*, *MYL4*), along with *CSRP3* (a mechanosensor) [98], *FMOD*  
567 (fibromodulin, a regulator of fibrillogenesis) [99], keratocan (*KERA*, a proteoglycan involved  
568 in myoblast differentiation) [100], matrix metalloproteinase 2 (*MMP2*, a proteolytic enzyme  
569 associated with muscle regeneration) [101], and calsequestrin 2 (*CASQ2*, one of the most  
570 abundant  $\text{Ca}^{2+}$ -binding proteins in the sarcoplasmic reticulum, essential for muscle  
571 contraction) [102].

572 Genes enriched in muscle are of particular biological and commercial interest because  
573 Texel sheep exhibit enhanced muscling and less fat [103], due to a single nucleotide  
574 polymorphism (SNP) in the 3' untranslated region of the myostatin gene *MSTN* (synonym  
575 *GDF-8*) which generates an illegitimate miRNA binding site resulting in translational  
576 inhibition of myostatin synthesis and contributing to muscular hypertrophy [24, 104].  
577 Because heterozygotes have an intermediate phenotype, cross breeding of homozygous  
578 mutant Texel sheep with animals homozygous for the normal allele transmits something of

579 the Texel muscle phenotype to the offspring. An effect on muscle synthesis in the BFxT  
580 animals could be related to the myostatin genotype; genes with higher expression in the Texel  
581 than in the cross may be targets for myostatin inhibition [105], while those with lower  
582 expression in the Texel than in the cross may be directly or indirectly activated by myostatin  
583 and hence involved in the cessation of muscle differentiation. In cattle the myostatin mutation  
584 is associated with the downregulation of collagen genes including *COL1A1* and *COL1A2*  
585 [105]. This is consistent with the observation that these genes have higher expression in the  
586 heterozygous BFxT animals than the Texel animals. Since myostatin also regulates muscle  
587 fibre type [106] by suppressing the formation of fast-twitch fibres, individuals homozygous  
588 for inactivating myostatin mutations are likely to exhibit increased fast-twitch fibres [107].  
589 Many of the genes up-regulated in the BFxT relative to the Texel animals (e.g. *CSRP3* and  
590 *CASQ2*) are known to be specifically expressed in slow-twitch muscle [106, 108], and  
591 several down-regulated genes are associated with fast-twitch muscle (e.g. *TNNC2*, *TNNI2*  
592 and *SERCA1*) [109, 110]. Consequently, the difference between the cross-breed and pure  
593 Texel is in part attributable to an increased contribution of slow-twitch fibres, which in turn  
594 has been associated with desirable meat quality traits [111] highlighting the potential  
595 advantages of cross-breeding.

596 Enriched GO terms related to brain function include the ‘myelin sheath’ ( $p=6.1 \times 10^{-8}$ )  
597 and the ‘internode region of the axon’ ( $p=5.2 \times 10^{-5}$ ) (S19 Table). Candidate genes of  
598 particular interest were expressed in the cerebellum (S18 Table). For instance, in the BFxT  
599 relative to the Texel animals, there were approximately 8-fold expression increases in cochlin  
600 (*COCH*, which regulates intraocular pressure) [112] and brevican (*BCAN*, functions  
601 throughout brain development in both cell-cell and cell-matrix interactions) [113, 114] and a  
602 10-fold expression increase for myelin-associated oligodendrocyte basic protein, MOBP,  
603 which was previously unannotated in sheep (ENSOARG00000002491) and has a function in

604 late-stage myelin sheath compaction [115]. A 15-fold expression increase was observed for  
605 oligodendrocytic paranodal loop protein (*OPALIN*, a transmembrane protein unique to the  
606 myelin sheath [116]), in the BFXT relative to the Texel and a 10-fold increase for another  
607 unannotated gene myelin basic protein (*MBP*), which we have assigned to  
608 ENSOARG00000004374 [117]. Although these examples of a neuroendocrine-specific effect  
609 of cross-breeding are speculative, they are of interest as Scottish Blackface sheep exhibit both  
610 improved neonatal behavioural development [118] and more extensive foraging behaviour  
611 than lowland breeds such as the Texel, travelling further distances, covering greater areas and  
612 exploring higher altitudes [119].

613

#### 614 **Visualisation of the Expression Atlas**

615 We have provided the BFXT sheep gene expression atlas as a searchable database in  
616 the gene annotation portal BioGPS ([http://biogps.org/dataset/BDS\\_00015/sheep-atlas/](http://biogps.org/dataset/BDS_00015/sheep-atlas/)). By  
617 searching the dataset via the following link (<http://biogps.org/sheepatlas/>) the expression  
618 profile of any given gene can be viewed across tissues. An example profile of the *MSTN*  
619 (*GDF-8*) myostatin gene from sheep is included in Fig 6. BioGPS allows comparison of  
620 expression profiles across species and links to gene information for each gene [70, 120, 121].  
621 The Sheep Atlas BioGPS expression profiles are based on TPM estimates from the  
622 alignment-free Kallisto output for the BFXT libraries, averaged across samples from each  
623 developmental stage for ease of visualisation. It is important to note that there may be a  
624 degree of variation in the expression pattern of individual genes between individuals which is  
625 masked when the average profiles are displayed. In addition, to allow comparison between  
626 species BioGPS requires each gene have an Entrez ID, which is not the case for all genes in  
627 Oar v3.1 and as a consequence these genes do not have visualisable expression profiles in

628 BioGPS. The expression profiles of the genes without Entrez IDs can be found in S1 Dataset  
629 and S2 Dataset.

630 In parallel to the alignment-free Kallisto method, we also used an alignment-based  
631 approach to RNA-Seq processing, with the HISAT aligner [122] and StringTie assembler  
632 [123] (detailed in S1 Methods). These alignments will be published as tracks in the Ensembl  
633 genome browser in the short term and integrated into the next Ensembl genome release for  
634 sheep.

635

## 636 **Conclusions**

637 This work describes the transcriptional landscape of the sheep across all major organs  
638 and multiple developmental stages, providing the largest gene expression dataset from a  
639 livestock species to date. The diversity of samples included in the sheep transcriptional atlas  
640 is the greatest from any mammalian species, including humans. Livestock provide an  
641 attractive alternative to rodents as models for human conditions in that they are more human-  
642 like in their size, physiology and transcriptional regulation, as well as being economically  
643 important in their own right. Non-human models are required to study the fundamental  
644 biology of healthy adult mammals and as such this dataset represents a considerable new  
645 resource for understanding the biology of mammalian tissues and cells.

646 In this sheep transcriptional atlas gene expression was quantified at the gene level  
647 across a comprehensive set of tissues and cell-types, providing a starting point for assigning  
648 function based on cellular expression patterns. We have provided functional annotation for  
649 hundreds of genes that previously had no meaningful gene name using co-expression patterns  
650 across tissues and cells. Future analysis of this dataset will use the co-expression clusters to  
651 link gene expression to observable phenotypes by highlighting the expression patterns of  
652 candidate genes associated with specific traits from classical genetic linkage studies or

653 genome-wide association studies (GWAS). Gene expression datasets have been used in this  
654 way to characterise cell populations in mouse [22, 23] and in the biological discovery of  
655 candidate genes for key traits in sheep [124-126] and pigs [127, 128]. We have already  
656 utilised the dataset to examine the expression patterns of a set of candidate genes linked to  
657 mastitis resistance [129] in sheep, including comparative analysis with a recently available  
658 RNA-Seq dataset from sheep lactating mammary gland and milk samples [130]. The research  
659 community will now be able to use the sheep gene expression atlas dataset to examine the  
660 expression patterns of their genes or systems of interest, to answer many of the outstanding  
661 questions in ruminant biology, health, welfare and production.

662         Improving the functional annotation of livestock genomes is critical for biological  
663 discovery and in linking genotype to phenotype. The Functional Annotation of Animal  
664 Genomes Consortium (FAANG) aims to establish a data-sharing and research infrastructure  
665 capable of analysing efficiently genome wide functional data for animal species [26, 27].  
666 This analysis is undertaken on a large scale, including partner institutions from across the  
667 globe, to further our understanding of how variation in gene sequences and functional  
668 components shapes phenotypic diversity. Analysis of these data will improve our  
669 understanding of the link between genotype and phenotype, contribute to biological  
670 discovery of genes underlying complex traits and allow the development and exploitation of  
671 improved models for predicting complex phenotypes from sequence information. The sheep  
672 expression atlas is a major asset to genome assembly and functional annotation and provide  
673 the framework for interpretation of the relationship between genotype and phenotype in  
674 ruminants.

675

## 676 **Methods**

### 677 **Animals**

678 Approval was obtained from The Roslin Institute's and the University of Edinburgh's  
679 Protocols and Ethics Committees. All animal work was carried out under the regulations of  
680 the Animals (Scientific Procedures) Act 1986. Three male and three female Scottish  
681 Blackface x Texel sheep of approximately two years of age were acquired locally and housed  
682 indoors for a 7-10 day "settling-in period" prior to being euthanased (electrocution and  
683 exsanguination). Nine Scottish Blackface x Texel lambs were born at Dryden Farm Large  
684 Animal Unit. Three neonatal lambs were observed at parturition and euthanised immediately  
685 prior to their first feed, three lambs were euthanised at one week of age prior to rumination  
686 (no grass was present in their GI tract) and three at 8 weeks of age once rumination was  
687 established. The lambs were euthanised by schedule one cranial bolt. To obtain  
688 developmental tissues six Scottish Blackface ewes were mated to a Texel ram and scanned to  
689 ensure successful pregnancy at 21 days. Two were euthanised at 23 days, two at 35 days and  
690 two at 100 days gestation (electrocution followed by exsanguination). Corresponding time  
691 points (day 23, 35 and 100) from gestating BFxT ewes mated with a Texel ram and  
692 euthanised as for the Blackface ewes were also included. All the animals, were fed *ad libitum*  
693 on a diet of hay and 16% sheep concentrate nut, with the exception of the lambs pre-weaning  
694 who suckled milk from their mothers. Details of the animals sampled are included in S1  
695 Table.

696

### 697 **Tissue Collection**

698 Tissues (95 tissues/female and 93 tissues/male) and 5 cell types were collected from  
699 three male and three female adult Scottish Blackface x Texel (BFxT) sheep at two years of  
700 age. The same tissues were collected from nine lambs, 3 at birth, 3 at one week and 3 at 8  
701 weeks of age. Three embryonic time points were also included: three day-23 BFxT whole  
702 embryos, three BFxT day 35 embryos from which tissue was collected from each region of

703 the basic body plan and three day 100 BFxT embryos from which 80 tissues were collected.  
704 Reproductive tissue from the corresponding time points from 6 BFxT ewes, 2 at each  
705 gestational time point, was also collected. In addition, 3 pools of 8 day 7 blastocysts from  
706 abattoir derived oocytes (of unknown breed) fertilized with Texel semen were created using  
707 IVF.

708 The majority of tissue samples were collected into RNAlater (AM7021; Thermo  
709 Fisher Scientific, Waltham, USA) and a subset were snap frozen, including lipid rich tissues  
710 such as adipose and brain. To maintain RNA integrity all tissue samples were harvested  
711 within an hour from the time of death. A detailed list of the tissues collected and sequenced  
712 can be found in S2 Table. Within the scope of the project we could not generate sequence  
713 data from all the samples collected and have archived the remainder for future analysis.  
714 Sample metadata, conforming to the FAANG Consortium Metadata standards, for all the  
715 samples collected for the sheep gene expression atlas project has been deposited in the  
716 BioSamples database under project identifier GSB-718  
717 (<https://www.ebi.ac.uk/biosamples/groups/SAMEG317052>).

718

### 719 **Isolation of Cell Types**

720 All cell types were isolated on the day of euthanasia. Bone marrow cells were isolated  
721 from 10 posterior ribs as detailed for pig [131]. BMDMs were obtained by culturing bone  
722 marrow cells for 7 days in complete medium: RPMI 1640, Glutamax supplement (35050-61;  
723 Invitrogen, Paisley, U.K.), 20% sheep serum (S2263; Sigma Aldrich, Dorset, U.K.),  
724 penicillin/streptomycin (15140; Invitrogen) and in the presence of recombinant human CSF-1  
725 (rhCSF-1:  $10^4$  U/ml; a gift of Chiron, Emeryville, CA) on 100-mm<sup>2</sup> sterile petri dishes,  
726 essentially as described previously for pig [131]. For LPS stimulation the resulting  
727 macrophages were detached by vigorous washing with medium using a syringe and 18-g



728 needle, washed, counted, and seeded in tissue culture plates at  $10^6$  cells/ml in CSF-1–  
729 containing medium. The cells were treated with LPS from *Salmonella enterica* serotype  
730 minnesota Re 595 (L9764; Sigma-Aldrich) at a final concentration of 100 ng/ml as  
731 previously described in pig [131] and harvested into TRIzol<sup>®</sup> (Thermo Fisher Scientific) at 0,  
732 2, 4, 7 and 24 h post LPS treatment before storing at  $-80^{\circ}\text{C}$  for downstream RNA extraction.

733 PBMCs were isolated as described for pig [132]. MDMs were obtained by culturing  
734 PBMCs for 7 days in CSF-1–containing medium, as described above for BMDMs, and  
735 harvesting into TRIzol<sup>®</sup> (Thermo Fisher Scientific). Alveolar macrophages were obtained by  
736 broncho-alveolar lavage of the excised lungs with 500ml sterile PBS ( $\text{Mg}^{2+}$   $\text{Ca}^{2+}$  free)  
737 (P5493; Sigma Aldrich). The cells were kept on ice until processing. To remove surfactant  
738 and debris cells were filtered through 100 $\mu\text{M}$  cell strainers and centrifuged at  $400 \times g$  for 10  
739 min. The supernatant was removed and 5ml red blood cell lysis buffer (420301; BioLegend,  
740 San Diego, USA) added to the pellet for 5 min; then the cells were washed in PBS ( $\text{Mg}^{2+}$   
741  $\text{Ca}^{2+}$  free) (P5493; Sigma Aldrich) and centrifuged at  $400 \times g$  for 10 min. The pellet was  
742 collected, resuspended in sterile PBS ( $\text{Mg}^{2+}$   $\text{Ca}^{2+}$  free) (Sigma Aldrich), and counted.  
743 Alveolar macrophages were seeded in 6-well tissue culture plates in 2ml complete medium:  
744 RPMI 1640, Glutamax supplement (35050-61; Invitrogen), 20% sheep serum (S2263; Sigma  
745 Aldrich), penicillin/streptomycin (15140; Invitrogen) in the presence of rhCSF1 ( $10^4$  U/ml)  
746 overnight.

747 Blood leukocytes were isolated as described in [133]. Whole blood was spun at  $500 \times$   
748  $g$  for 10 min (no brake) to separate the buffy coats. These were then lysed in ammonium  
749 chloride lysis buffer (150mM  $\text{NH}_4\text{Cl}$ , 10mM  $\text{NaHCO}_3$ , 0.1mM EDTA) for 10 min on a  
750 shaking platform, then centrifuged at  $4^{\circ}\text{C}$  for 5 min at  $500 \times g$ . The resultant blood leukocyte  
751 pellets were stored in 1ml of RNAlater (Thermo Fisher Scientific) at  $-80^{\circ}\text{C}$ .

752 To isolate embryonic fibroblasts we harvested a day 35 embryo whole and transferred  
753 to outgrowth media (DMEM, high glucose, glutamine, pyruvate (Thermo Fisher Scientific;  
754 11995065), FBS (Fetal Bovine Serum) (Thermo Fisher Scientific; 10500056), MEM NEAA  
755 (Thermo Fisher Scientific; 11140068), penicillin/streptomycin (Invitrogen), Fungizone  
756 (Amphotericin B; Thermo Fisher Scientific; 15290018), Gentamicin (Thermo Fisher  
757 Scientific; 15750037)). In a sterile flow hood the head was removed and the body cavity  
758 eviscerated. The remaining tissue was washed 3 times in PBS (Mg<sup>2+</sup> Ca<sup>2+</sup> free) (Sigma  
759 Aldrich) with penicillin/streptomycin (Invitrogen). 5ml of Trypsin-EDTA solution (T4049;  
760 Sigma Aldrich) was added and the sample incubated at 37°C for 5 min then vortexed and  
761 incubated for an additional 5min at 37°C. 3ml of solution was removed and filtered through a  
762 100uM cell strainer, 5ml of outgrowth media was then passed through the strainer and  
763 combined with the sample. The sample was centrifuged at 200 x g for 3 min and the pellet  
764 resuspended in 9ml of out growth media before splitting the sample between 3x T75 flasks.  
765 The process then was repeated for remaining 2ml of sample left after the digestion with  
766 Trypsin (above). Embryonic fibroblasts were incubated for 5-7 days (until 80-90% confluent)  
767 then harvested into TRIzol<sup>®</sup> Reagent (Thermo Fisher Scientific).

768

#### 769 **RNA Extraction and Library Preparation**

770 RNA was extracted using the same method as the Roslin RNA-Seq samples included  
771 in the sheep genome project detailed in [18]. For each RNA extraction <100mg of tissue was  
772 processed. Care was taken to ensure snap frozen samples remained frozen prior to  
773 homogenisation, and any cutting down to the appropriate size was carried out over dry ice.  
774 Tissue samples were first homogenised in 1ml of TRIzol<sup>®</sup> reagent (15596018; Thermo Fisher  
775 Scientific) with either CK14 (432-3751; VWR, Radnor, USA) or CKMIX (431-0170; VWR)  
776 tissue homogenising ceramic beads on a Precellys<sup>®</sup> Tissue Homogeniser (Bertin Instruments;  
777 Montigny-le-Bretonneux, France). Homogenisation conditions were optimised for tissue type

778 but most frequently 5000 rpm for 20 sec. Cell samples which had previously been collected  
779 in TRIzol<sup>®</sup> Reagent (15596018; Thermo Fisher Scientific), were mixed by pipetting to  
780 homogenise. Homogenised (cell/tissue) samples were then incubated at room temperature for  
781 5 min to allow complete dissociation of the nucleoprotein complex, 200µl BCP (1-bromo-3-  
782 chloropropane) (B9673; Sigma Aldrich) was added, then the sample was shaken vigorously  
783 for 15 sec and incubated at room temperature for 3 min. The sample was centrifuged for 15  
784 min at 12,000 x g, at 4°C to separate the homogenate into a clear upper aqueous layer  
785 (containing RNA), an interphase and red lower organic layers (containing the DNA and  
786 proteins), for three min. DNA and trace phenol was removed using the RNeasy Mini Kit  
787 (74106; Qiagen Hilden, Germany) column purification, following the manufacturers  
788 instructions (Protocol: Purification of Total RNA from Animal Tissues, from step 5  
789 onwards). RNA quantity was measured using a Qubit RNA BR Assay kit (Q10210; Thermo  
790 Fisher Scientific) and RNA integrity estimated on an Agilent 2200 TapeStation System  
791 (Agilent Genomics, Santa Clara, USA) using the RNA Screentape (5067-5576; Agilent  
792 Genomics) to ensure RNA quality was of RIN<sup>e</sup> > 7.

793 RNA-Seq libraries were prepared by Edinburgh Genomics (Edinburgh Genomics,  
794 Edinburgh, UK) and run on the Illumina HiSeq 2500 sequencing platform (Illumina, San  
795 Diego, USA). Details of the libraries generated can be found in S2 Table. A subset of 10  
796 tissue samples and BMDMs at 0 h and 7h (+/-LPS) (Table 1), from each individual, were  
797 sequenced at a depth of >100 million strand-specific 125bp paired-end reads per sample  
798 using the standard Illumina TruSeq total RNA library preparation protocol (Illumina; Part:  
799 15031048, Revision E). These samples were chosen to include the majority of transcriptional  
800 output, as in [134]). An additional 40 samples from the tissues and cell types collected per  
801 individual (44/female and 42/male), were selected and sequenced at a depth of >25 million

802 strand-specific paired-end reads per sample using the standard Illumina TruSeq mRNA  
803 library preparation protocol (poly-A selected) (Illumina; Part: 15031047 Revision E).

804 In addition to the samples from the 6 adults, tissue was also collected from other  
805 developmental time points. The GI tract tissues collected from the 9 BFxT lambs, 3 at birth, 3  
806 at one week of age and 3 at 8 weeks of age were sequenced at a depth of >25 million reads  
807 per sample using the Illumina mRNA TruSeq library preparation protocol (poly-A selected)  
808 as above. Of the early developmental time points, the three 23 day old embryos from BFxT  
809 sheep were sequenced at >100 million reads using the Illumina total RNA TruSeq library  
810 preparation protocol (as above), while the other embryonic samples and the ovary and  
811 placenta from the gestating ewes were sequenced at a depth of >25 million reads per sample  
812 using the Illumina mRNA TruSeq library preparation protocol (as above). In addition, three  
813 libraries were generated using the NuGen Ovation Single Cell RNA-Seq System (0342-32-  
814 NUG; NuGen, San Carlos, USA) from pooled samples of 8 blastocysts (as in [135]), and  
815 sequenced at a depth of >60 million reads per sample. A detailed list of prepared libraries,  
816 including library type can be found in S2 Table.

817 To identify spurious samples we used sample-to-sample correlation, of the transposed  
818 data from S1 Dataset, in Miru (Kajeka Ltd) [37]. The sample-to-sample graph is presented in  
819 S2 Fig. The expression profiles of any samples clustering unexpectedly (i.e. were not found  
820 within clusters of samples of the same type/biological replicate) were examined in detail.  
821 Generally the correlation between samples was high, although 4 spurious samples and 4 sets  
822 of swapped samples were identified. These samples were either relabeled or removed as  
823 appropriate.

824

825 **Data Quality Control and Processing**

826 Raw data is deposited in the European Nucleotide Archive under study accession  
827 number PRJEB19199 (<http://www.ebi.ac.uk/ena/data/view/PRJEB19199>). The RNA-Seq  
828 data processing methodology and pipelines are described in detail in S1 Methods. For each  
829 tissue a set of expression estimates, as transcripts per million (TPM), were obtained using the  
830 high speed transcript quantification tool Kallisto [29]. In total, the expression atlas utilised  
831 approximately 26 billion (pseudo) alignments (S3 Table), capturing a large proportion of  
832 protein-coding genes per tissue (S20 Table).

833 The accuracy of Kallisto is dependent on a high quality index (reference  
834 transcriptome) [29], so in order to ensure an accurate set of gene expression estimates we  
835 employed a ‘two-pass’ approach. We first ran Kallisto on all samples using as its index the  
836 Oar v3.1 reference transcriptome. We then parsed the resulting data to revise this index. This  
837 was in order to include, in the second index, those transcripts that should have been there but  
838 were not (i.e. where the reference annotation is incomplete), and to remove those transcripts  
839 that should not be there but were (i.e. where the reference annotation is poor quality and a  
840 spurious model has been introduced). For the first criterion, we obtained the subset of reads  
841 that Kallisto could not align, assembled those *de novo* into putative transcripts (S1 Methods),  
842 then retained each transcript only if it could be robustly annotated (by, for instance, encoding  
843 a protein similar to one of known function) and showed coding potential (S21 Table). For the  
844 second criterion, we identified those members of the reference transcriptome for which no  
845 evidence of expression could be found in any of the hundreds of samples comprising the  
846 atlas. These were then discarded from the index. Finally, this revised index was used for a  
847 second iteration of Kallisto, generating higher-confidence expression level estimates. This  
848 improved the capture rate of protein-coding genes (S22 Table). A detailed description of this  
849 process can be found in S1 Methods.

850 We complemented this alignment-free method with a conventional alignment-based  
851 approach to RNA-Seq processing, using the HISAT aligner [122] and StringTie assembler  
852 [123]. A detailed description of this pipeline is included in S1 Methods. This assembly is  
853 highly accurate with respect to the existing (Oar v3.1) annotation, precisely reconstructing  
854 almost all exon (96%), transcript (98%) and gene (99%) models (S23 Table). Although this  
855 validates the set of transcripts used to generate the Kallisto index, we did not  
856 use HISAT/StringTie to quantify expression. This is because a standardised RNA space is  
857 necessary to compare data from mRNA-Seq and total RNA-Seq libraries [31], which cannot  
858 be applied if expression is quantified via genomic alignment. Unlike alignment-free methods,  
859 however, HISAT/StringTie can be used to identify novel transcript models (S24 Table),  
860 particularly for ncRNAs, which will be described in detail in a dedicated analysis. We will  
861 publish the alignments from HISAT and Stringtie as tracks in the Ensembl genome browser  
862 in the short term and integrate the alignments into Ensembl and Biomart in the next Ensembl  
863 release for sheep.

864

### 865 **Inclusion of Additional RNA-Seq Datasets from Sheep**

866 Additional RNA-Seq data was obtained from a previous characterisation of the  
867 transcriptome of 3 Texel sheep included in the release of the current sheep genome Oar v3.1  
868 [18]. The dataset included tissues from an adult Texel ram (n=29), an adult Texel ewe (n=25)  
869 and their female (8-9 month old) lamb (n=28), plus a whole embryo (day 15 gestation) from  
870 the same ram-ewe pairing. The raw read data from the 83 Texel samples incorporated into  
871 this dataset and previously published in [18] is located in the European Nucleotide Archive  
872 (ENA) study accession PRJEB6169 (<http://www.ebi.ac.uk/ena/data/view/PRJEB6169>). The  
873 metadata for these individuals is included in the BioSamples database under Project Identifier  
874 GSB-1451 (<https://www.ebi.ac.uk/biosamples/groups/SAMEG317052>). A small proportion

875 of the tissues included in the Texel RNA-Seq dataset were not sampled in the BFXT gene  
876 expression atlas. Those unique to the Texel are largely drawn from the female reproductive,  
877 integument and nervous systems: cervix, corpus luteum, ovarian follicles, hypothalamus,  
878 brain stem, omentum and skin (side and back). Details of the Texel RNA-Seq libraries  
879 including tissue and cell type are included in S25 Table. The Texel samples were all prepared  
880 using the Illumina TruSeq stranded total RNA protocol with the Ribo-Zero Gold option for  
881 both cytoplasmic and mitochondrial rRNA removal, and sequenced using the Illumina HiSeq  
882 2500 (151bp paired-end reads) [18]. As above, Kallisto was used to estimate expression level  
883 for all samples, using the revised reference transcriptome (from the ‘second pass’) as its  
884 index.

885

### 886 **Correcting for the Effect of Multiple Library Types**

887 To correct for the confounding effect of multiple library types we applied a batch  
888 effect correction. We have previously validated this method using a subset of the sheep atlas  
889 expression atlas samples from BMDMs (+/- LPS) sequenced both as mRNA and total RNA  
890 libraries [31]. As described above, for the Kallisto second pass, we constrained the Kallisto  
891 index to contain only the transcripts of protein-coding genes, pseudogenes and processed  
892 pseudogenes, the majority of which are poly(A)<sup>+</sup> and so are present in both mRNA-Seq and  
893 total RNA-Seq samples. We then calculated, per gene, the ratio of mean TPM across all  
894 mRNA-Seq libraries to mean TPM across all total RNA-Seq libraries. Given the scope of the  
895 tissues sampled for both library types (all major organ systems from both sexes and from  
896 different developmental states), neither mean is likely to be skewed by any tissue-specificity  
897 of expression. As such, any deviations of this ratio from 1 will reflect variance introduced by  
898 library type/depth. Thus, to correct each gene’s set of expression estimates for this effect of  
899 library type, we multiplied all total RNA-Seq TPMs by this ratio. To validate this approach

900 we used principal component bi-plot analysis, described and shown in S1 Methods and S1  
901 Fig.

902

### 903 **Gene Expression, Network Cluster Analysis and Annotation**

904 Network cluster analysis of the sheep gene expression atlas was performed using  
905 Miru (Kajeka Ltd, Edinburgh, UK) [35-37]. In brief, similarities between individual gene  
906 expression profiles were determined by calculating a Pearson correlation matrix for both  
907 gene-to-gene and sample-to-sample comparisons, and filtering to remove relationships where  
908  $r < 0.75$ . A network graph was constructed by connecting the remaining nodes (genes) with  
909 edges (where the correlation exceeded the threshold value). This graph was interpreted by  
910 applying the Markov Cluster algorithm (MCL) [38] at an inflation value (which determines  
911 cluster granularity) of 2.2. The local structure of the graph was then examined visually.  
912 Genes with robust co-expression patterns, implying related functions, clustered together,  
913 forming cliques of highly interconnected nodes. A principle of ‘guilt by association’ was then  
914 applied, i.e. the function of an unannotated gene could be inferred from the genes it clustered  
915 with [20, 136]. Expression profiles for each cluster were examined in detail to understand the  
916 significance of each cluster in the context of the biology of sheep tissues and cells. Clusters 1  
917 to 50 (Table 2) were assigned a functional ‘class’ and ‘sub-class’ manually by first  
918 determining if multiple genes within a cluster shared a similar biological function based on  
919 both gene ontology [39], determined using the Bioconductor package ‘topGO’ [137] (GO  
920 term enrichment for clusters 1 to 50 is shown in S12 Table). We then compared the clusters  
921 with tissue- and cell-specific clusters in other large-scale network-based gene expression  
922 analyses including the pig gene expression atlas [6], the human protein atlas [69, 72, 138] and  
923 the mouse atlas [9, 139, 140]. More specific annotation of the GI tract clusters in sheep was



924 based on network and pathway analysis from the sheep genome paper and a subsequent  
925 satellite publication [18, 21]. The gene component of all clusters can be found in S11 Table.

926 We assigned gene names to unannotated genes in Oar v3.1 based on their co-  
927 expression pattern, tissue specificity, and reciprocal percent identity to a set of nine known  
928 ruminant proteomes (S7 Table). The annotation pipeline is described in detail in S1 Methods  
929 and included a set of quality categories summarised in S5 Table. We were able to assign gene  
930 names to >1000 previously unannotated genes in Oar v3.1. Candidate gene names are given  
931 as both a shortlist (S8 Table) and a longlist (S9 Table), the latter intended for manual review  
932 as informative annotations may still be made without every one of the above criteria being  
933 met.

934

## 935 **Abbreviations**

936 AM, Alveolar Macrophage; BFxT, Scottish Blackface x Texel; BMDM, Bone Marrow  
937 Derived Macrophage; CNS, Central Nervous System; DE, Differential Expression; EBI,  
938 European Bioinformatics Institute; ENA, European Nucleotide Archive; FAANG, Functional  
939 Annotation of ANimal Genomes; GI, Gastrointestinal; HGNC, HUGO (Human Genome  
940 Organisation) Gene Nomenclature Committee; LPS, Lipopolysaccharide; MCL, Markov  
941 Cluster Algorithm; MCLi, Markov Cluster Algorithm Inflation; MDM, Monocyte Derived  
942 Macrophage; mRNA, messenger Ribonucleic Acid; NF- $\kappa$ B, Nuclear Factor Kappa-Light-  
943 Chain-Enhancer of Activated B-Cells; PBMC, Peripheral Blood Mononuclear Cell; RNA-  
944 Seq, RNA Sequencing; PPAR, Peroxisome Proliferator-Activated Receptor; rhCSF1,  
945 Recombinant Human Colony Stimulating Factor 1; SIGLEC, Sialic Acid-Binding  
946 Immunoglobulin-Like Lectin; SNP, Single Nucleotide Polymorphism

947

## 948 **Acknowledgments**

949 We would like to thank the large number of people at the Roslin Institute who helped with  
950 the many aspects of the sheep atlas project. Douglas McGavin and David Chisholm  
951 coordinated the management of the sheep at Dryden Farm. Tim King, Peter Tennant, Adrian  
952 Ritchie, John Bracken and Pip Beard conducted post mortems on the animals. The lists of  
953 tissues for collection were developed by Erika Abbondati. Detailed dissection of the brain  
954 was performed by Fiona Houston. The tissue collection team included Heather Finlayson,  
955 Christine Burkhard, Alison Wilson, Ailsa Carlisle, Mark Barnett, Gemma Davis, Anna  
956 Raper, Rocio Rojo, Alex Brown, Chris Proudfoot, Laura Glendinning, Sara Clohisey,  
957 Yolanda Corripio-Miyar, Jack Ferguson, Karen Fernie and Jason Ioannidis. Blood  
958 Leukocytes were isolated by John Hopkins. RNA from the GI Tract was isolated by Gemma  
959 Davis and from embryonic fibroblasts by Charity Muriuki. Library preparation and  
960 sequencing was carried out by Edinburgh Genomics, The University of Edinburgh. We  
961 would also like to thank Norman Russell (The Roslin Institute) for generating the  
962 photographic images used and Andrew Su for allowing us to use BioGPS as the platform for  
963 visualisation of the expression data.

964

## 965 **References**

966

- 967 1. Marino R, Atzori AS, D'Andrea M, Iovane G, Trabalza-Marinucci M, Rinaldi L.  
968 Climate change: Production performance, health issues, greenhouse gas emissions and  
969 mitigation strategies in sheep and goat farming. *Small Ruminant Research*. 2016;135:50-9.  
970 doi: [doi.org/10.1016/j.smallrumres.2015.12.012](https://doi.org/10.1016/j.smallrumres.2015.12.012).
- 971 2. Brito LF, Clarke SM, McEwan JC, Miller SP, Pickering NK, Bain WE, et al.  
972 Prediction of genomic breeding values for growth, carcass and meat quality traits in a multi-

973 breed sheep population using a HD SNP chip. *BMC Genetics*. 2017;18(1):7. doi:  
974 10.1186/s12863-017-0476-8.

975 3. Hayes BJ, Lewin HA, Goddard ME. The future of livestock breeding: genomic  
976 selection for efficiency, reduced emissions intensity, and adaptation. *Trends in Genetics*.  
977 2013;29(4):206-14. doi: doi.org/10.1016/j.tig.2012.11.009.

978 4. Daetwyler HD, Hickey JM, Henshall JM, Dominik S, Gredler B, van der Werf JHJ, et  
979 al. Accuracy of estimated genomic breeding values for wool and meat traits in a multi-breed  
980 sheep population. *Animal Production Science*. 2010;50(12):1004-10. doi:  
981 doi.org/10.1071/AN10096.

982 5. Wickramasinghe S, Cánovas A, Rincón G, Medrano JF. RNA-Sequencing: A tool to  
983 explore new frontiers in animal genetics. *Livestock Science*. 2014;166:206-16. doi:  
984 doi.org/10.1016/j.livsci.2014.06.015.

985 6. Freeman TC, Ivens A, Baillie JK, Beraldi D, Barnett MW, Dorward D, et al. A gene  
986 expression atlas of the domestic pig. *BMC Biology*. 2012;10(1):90. doi: 10.1186/1741-7007-  
987 10-90.

988 7. Harhay GP, Smith TP, Alexander LJ, Haudenschild CD, Keele JW, Matukumalli LK,  
989 et al. An atlas of bovine gene expression reveals novel distinctive tissue characteristics and  
990 evidence for improving genome annotation. *Genome Biology*. 2010;11(10):R102. doi:  
991 10.1186/gb-2010-11-10-r102.

992 8. Su AI, Cooke MP, Ching KA, Hakak Y, Walker JR, Wiltshire T, et al. Large-scale  
993 analysis of the human and mouse transcriptomes. *Proc Natl Acad Sci USA*. 2002;99. doi:  
994 10.1073/pnas.012025199.

995 9. Su AI, Wiltshire T, Batalov S, Lapp H, Ching KA, Block D, et al. A gene atlas of the  
996 mouse and human protein-encoding transcriptomes. *Proc Natl Acad Sci USA*. 2004;101. doi:  
997 10.1073/pnas.0400782101.

- 998 10. Mansour TA, Scott EY, Finno CJ, Bellone RR, Mienaltowski MJ, Penedo MC, et al.  
999 Tissue resolved, gene structure refined equine transcriptome. *BMC Genomics*.  
1000 2017;18(1):103. doi: 10.1186/s12864-016-3451-2.
- 1001 11. Andersson R, Gebhard C, Miguel-Escalada I, Hoof I, Bornholdt J, Boyd M, et al. An  
1002 atlas of active enhancers across human cell types and tissues. *Nature*. 2014;507(7493):455-  
1003 61. doi: doi.org/10.1038/nature12787.
- 1004 12. Lizio M, Harshbarger J, Shimoji H, Severin J, Kasukawa T, Sahin S, et al. Gateways  
1005 to the FANTOM5 promoter level mammalian expression atlas. *Genome Biology*.  
1006 2015;16(1):22. doi: 10.1186/s13059-014-0560-6.
- 1007 13. Forrest AR, Kawaji H, Rehli M, Baillie JK, De Hoon M, Haberle V, et al. A  
1008 promoter-level mammalian expression atlas. *Nature*. 2014;507(7493):462-70. doi:  
1009 doi.org/10.1038/nature13182.
- 1010 14. Birney E, Stamatoyannopoulos JA, Dutta A, Guigo R, Gingeras TR, Margulies EH, et  
1011 al. Identification and analysis of functional elements in 1% of the human genome by the  
1012 ENCODE pilot project. *Nature*. 2007;447. doi: 10.1038/nature05874.
- 1013 15. Melé M, Ferreira PG, Reverter F, DeLuca DS, Monlong J, Sammeth M, et al. The  
1014 human transcriptome across tissues and individuals. *Science*. 2015;348(6235):660. doi: doi:  
1015 10.1126/science.aaa0355.
- 1016 16. Bickhart DM, Rosen BD, Koren S, Sayre BL, Hastie AR, Chan S, et al. Single-  
1017 molecule sequencing and chromatin conformation capture enable de novo reference assembly  
1018 of the domestic goat genome. *Nat Genet*. 2017;49(4):643-50. doi: doi.org/10.1038/ng.3802.
- 1019 17. Worley KC. A golden goat genome. *Nat Genet*. 2017;49(4):485-6. doi:  
1020 10.1038/ng.3824.

- 1021 18. Jiang Y, Xie M, Chen W, Talbot R, Maddox JF, Faraut T, et al. The sheep genome  
1022 illuminates biology of the rumen and lipid metabolism. *Science*. 2014;344(6188):1168. doi:  
1023 doi: 10.1126/science.1252806.
- 1024 19. Krupp M, Marquardt JU, Sahin U, Galle PR, Castle J, Teufel A. RNA-Seq Atlas - A  
1025 reference database for gene expression profiling in normal tissue by next generation  
1026 sequencing. *Bioinformatics*. 2012;28. doi: 10.1093/bioinformatics/bts084.
- 1027 20. Oliver S. Proteomics: Guilt-by-association goes global. *Nature*. 2000;403(6770):601-  
1028 3. doi: doi.org/10.1038/35001165.
- 1029 21. Xiang R, Oddy VH, Archibald AL, Vercoe PE, Dalrymple BP. Epithelial, metabolic  
1030 and innate immunity transcriptomic signatures differentiating the rumen from other sheep  
1031 and mammalian gastrointestinal tract tissues. *PeerJ*. 2016;4:e1762. doi: 10.7717/peerj.1762.
- 1032 22. Mabbott NA, Kenneth Baillie J, Hume DA, Freeman TC. Meta-analysis of lineage-  
1033 specific gene expression signatures in mouse leukocyte populations. *Immunobiology*.  
1034 2010;215. doi: 10.1016/j.imbio.2010.05.012.
- 1035 23. Mabbott NA, Kenneth Baillie J, Kobayashi A, Donaldson DS, Ohmori H, Yoon SO,  
1036 et al. Expression of mesenchyme-specific gene signatures by follicular dendritic cells:  
1037 insights from the meta-analysis of microarray data from multiple mouse cell populations.  
1038 *Immunology*. 2011;133. doi: 10.1111/j.1365-2567.2011.03461.x.
- 1039 24. Clop A, Marcq F, Takeda H, Pirottin D, Tordoir X, Bibe B, et al. A mutation creating  
1040 a potential illegitimate microRNA target site in the myostatin gene affects muscularity in  
1041 sheep. *Nat Genet*. 2006;38(7):813-8. doi: doi.org/10.1038/ng1810.
- 1042 25. Blackface Sheep Breeders Association [1st March 2017]. Available from:  
1043 <http://www.scottish-blackface.co.uk/>.
- 1044 26. Andersson L, Archibald AL, Bottema CD, Brauning R, Burgess SC, Burt DW, et al.  
1045 Coordinated international action to accelerate genome-to-phenome with FAANG, the

- 1046 Functional Annotation of Animal Genomes project. *Genome Biology*. 2015;16(1):57. doi:  
1047 10.1186/s13059-015-0622-4.
- 1048 27. Tuggle CK, Giuffra E, White SN, Clarke L, Zhou H, Ross PJ, et al. GO-FAANG  
1049 meeting: a Gathering On Functional Annotation of Animal Genomes. *Animal Genetics*.  
1050 2016;47(5):528-33. doi: 10.1111/age.12466.
- 1051 28. Carninci P, Kasukawa T, Katayama S, Gough J, Frith MC, Maeda N, et al. The  
1052 transcriptional landscape of the mammalian genome. *Science*. 2005;309. doi:  
1053 10.1126/science.1112014.
- 1054 29. Bray NL, Pimentel H, Melsted P, Pachter L. Near-optimal probabilistic RNA-seq  
1055 quantification. *Nat Biotech*. 2016;34(525–527). doi: doi.org/10.1038/nbt.3519.
- 1056 30. Robert C, Watson M. Errors in RNA-Seq quantification affect genes of relevance to  
1057 human disease. *Genome Biology*. 2015;16:177. doi: 10.1186/s13059-015-0734-x.
- 1058 31. Bush SJ, McCulloch MEB, Summers KM, Hume DA, Clark EL. Integration of  
1059 quantitated expression estimates from polyA-selected and rRNA-depleted RNA-seq libraries.  
1060 *BMC Bioinformatics*. 2017;In Press.
- 1061 32. Guo S, Lim D, Dong Z, Saunders TL, Ma PX, Marcelo CL, et al. Dentin  
1062 sialophosphoprotein: a regulatory protein for dental pulp stem cell identity and fate. *Stem*  
1063 *Cells Dev*. 2014;23(23):2883-94. doi: 10.1089/scd.2014.0066.
- 1064 33. Wyatt K, Gao C, Tsai JY, Fariss RN, Ray S, Wistow G. A role for lengsin, a recruited  
1065 enzyme, in terminal differentiation in the vertebrate lens. *J Biol Chem*. 2008;283(10):6607-  
1066 15. doi: 10.1074/jbc.M709144200.
- 1067 34. Pruitt KD, Tatusova T, Maglott DR. NCBI Reference Sequence (RefSeq): a curated  
1068 non-redundant sequence database of genomes, transcripts and proteins. *Nucleic acids*  
1069 *research*. 2005;33(Database Issue):D501-D4. doi: 10.1093/nar/gki025.

- 1070 35. Freeman TC, Goldovsky L, Brosch M, van Dongen S, Maziere P, Grocock RJ, et al.  
1071 Construction, visualisation, and clustering of transcription networks from microarray  
1072 expression data. *PLoS Computational Biology*. 2007;3(10):2032-42. doi:  
1073 10.1371/journal.pcbi.0030206.
- 1074 36. Theocharidis A, van Dongen S, Enright AJ, Freeman TC. Network visualization and  
1075 analysis of gene expression data using BioLayout Express(3D). *Nat Protoc*. 2009;4(10):1535-  
1076 50. Epub 2009/10/03. doi: 10.1038/nprot.2009.177.
- 1077 37. Kajeka. Miru 見る 2016 [16th March 2017]. Available from:  
1078 <https://kajeka.com/miru/miru-about/>.
- 1079 38. van Dongen S, Abreu-Goodger C. Using MCL to extract clusters from networks.  
1080 *Methods Mol Biol*. 2012;804:281-95. doi: 10.1007/978-1-61779-361-5\_15.
- 1081 39. Ashburner M, Ball CA, Blake JA, Botstein D, Butler H, Cherry JM, et al. Gene  
1082 ontology: tool for the unification of biology. The Gene Ontology Consortium. *Nat Genet*.  
1083 2000;25. doi: 10.1038/75556.
- 1084 40. Hume DA, Summers KM, Raza S, Baillie JK, Freeman TC. Functional clustering and  
1085 lineage markers: insights into cellular differentiation and gene function from large-scale  
1086 microarray studies of purified primary cell populations. *Genomics*. 2010;95. doi:  
1087 10.1016/j.ygeno.2010.03.002.
- 1088 41. Stumvoll M, Meyer C, Perriello G, Kreider M, Welle S, Gerich J. Human kidney and  
1089 liver gluconeogenesis: evidence for organ substrate selectivity. *American Journal of*  
1090 *Physiology - Endocrinology And Metabolism*. 1998;274(5):E817.
- 1091 42. Ayyar VS, Almon RR, DuBois DC, Sukumaran S, Qu J, Jusko WJ. Functional  
1092 proteomic analysis of corticosteroid pharmacodynamics in rat liver: Relationship to hepatic  
1093 stress, signaling, energy regulation, and drug metabolism. *Journal of Proteomics*. doi:  
1094 doi.org/10.1016/j.jprot.2017.03.007.

- 1095 43. FANTOM Consortium. ZENBU: a collaborative, omics data integration and  
1096 interactive visualization system 2017 [27th March 2017]. Available from:  
1097 <http://fantom.gsc.riken.jp/zenbu/>.
- 1098 44. Severin J, Lizio M, Harshbarger J, Kawaji H, Daub CO, Hayashizaki Y, et al.  
1099 Interactive visualization and analysis of large-scale sequencing datasets using ZENBU. *Nat*  
1100 *Biotech.* 2014;32(3):217-9. doi: doi.org/10.1038/nbt.2840.
- 1101 45. Basten SG, Giles RH. Functional aspects of primary cilia in signaling, cell cycle and  
1102 tumorigenesis. *Cilia.* 2013;2(1):6. doi: 10.1186/2046-2530-2-6.
- 1103 46. Izawa I, Goto H, Kasahara K, Inagaki M. Current topics of functional links between  
1104 primary cilia and cell cycle. *Cilia.* 2015;4(1):12. doi: 10.1186/s13630-015-0021-1.
- 1105 47. Jackson PK. Do cilia put brakes on the cell cycle? *Nat Cell Biol.* 2011;13. doi:  
1106 10.1038/ncb0411-340.
- 1107 48. Doig TN, Hume DA, Theocharidis T, Goodlad JR, Gregory CD, Freeman TC.  
1108 Coexpression analysis of large cancer datasets provides insight into the cellular phenotypes  
1109 of the tumour microenvironment. *BMC Genomics.* 2013;14(1):469. doi: 10.1186/1471-2164-  
1110 14-469.
- 1111 49. Calvo SE, Clauser KR, Mootha VK. MitoCarta2.0: an updated inventory of  
1112 mammalian mitochondrial proteins. *Nucleic Acids Research.* 2016;44(Database  
1113 issue):D1251-D7. doi: 10.1093/nar/gkv1003.
- 1114 50. Sharma S, Sud N, Wiseman DA, Carter AL, Kumar S, Hou Y, et al. Altered carnitine  
1115 homeostasis is associated with decreased mitochondrial function and altered nitric oxide  
1116 signaling in lambs with pulmonary hypertension. *American Journal of Physiology - Lung*  
1117 *Cellular and Molecular Physiology.* 2008;294(1):L46. doi: 10.1152/ajplung.00247.2007.



- 1118 51. McCommis KS, Finck BN. Mitochondrial pyruvate transport: a historical perspective  
1119 and future research directions. *The Biochemical Journal*. 2015;466(3):443-54. doi:  
1120 10.1042/BJ20141171.
- 1121 52. Xiang R, McNally J, Rowe S, Jonker A, Pinares-Patino CS, Oddy VH, et al. Gene  
1122 network analysis identifies rumen epithelial cell proliferation, differentiation and metabolic  
1123 pathways perturbed by diet and correlated with methane production. *Scientific Reports*.  
1124 2016;6:39022. doi: doi.org/10.1038/srep39022.
- 1125 53. Hofmann RR. Evolutionary steps of ecophysiological adaptation and diversification  
1126 of ruminants: a comparative view of their digestive system. *Oecologia*. 1989;78(4):443-57.  
1127 doi: 10.1007/BF00378733.
- 1128 54. Rabbani I, Siegling-Vlitakis C, Noci B, Martens H. Evidence for NHE3-mediated Na  
1129 transport in sheep and bovine forestomach. *American Journal of Physiology - Regulatory,*  
1130 *Integrative and Comparative Physiology*. 2011;301(2):R313. doi:  
1131 10.1152/ajpregu.00580.2010.
- 1132 55. Foster AM, Baliwag J, Chen CS, Guzman AM, Stoll SW, Gudjonsson JE, et al. IL-36  
1133 Promotes Myeloid Cell Infiltration, Activation, and Inflammatory Activity in Skin. *The*  
1134 *Journal of Immunology*. 2014;192(12):6053. doi: 10.4049/jimmunol.1301481.
- 1135 56. Perkins ND. Integrating cell-signalling pathways with NF-[kappa]B and IKK  
1136 function. *Nat Rev Mol Cell Biol*. 2007;8(1):49-62. doi: 10.1038/nrm2083.
- 1137 57. Palmer C, Diehn M, Alizadeh AA, Brown PO. Cell-type specific gene expression  
1138 profiles of leukocytes in human peripheral blood. *BMC Genomics*. 2006;7(1):115. doi:  
1139 10.1186/1471-2164-7-115.
- 1140 58. Margraf S, Garner LI, Wilson TJ, Brown MH. A polymorphism in a phosphotyrosine  
1141 signalling motif of CD229 (Ly9, SLAMF3) alters SH2 domain binding and T-cell activation.  
1142 *Immunology*. 2015;146(3):392-400. doi: 10.1111/imm.12513.

- 1143 59. Akira S, Takeda K. Toll-like receptor signalling. *Nat Rev Immunol.* 2004;4(7):499-  
1144 511. doi: 10.1038/nri1391.
- 1145 60. Baillie JK, Arner E, Daub C, De Hoon M, Itoh M, Kawaji H, et al. Analysis of the  
1146 human monocyte-derived macrophage transcriptome and response to lipopolysaccharide  
1147 provides new insights into genetic aetiology of inflammatory bowel disease. *PLoS Genetics.*  
1148 2017;13(3):e1006641. doi: 10.1371/journal.pgen.1006641.
- 1149 61. Pflanz S, Timans JC, Cheung J, Rosales R, Kanzler H, Gilbert J, et al. IL-27, a  
1150 Heterodimeric Cytokine Composed of EB13 and p28 Protein, Induces Proliferation of Naive  
1151 CD4+ T Cells. *Immunity.* 2002;16(6):779-90. doi: doi.org/10.1016/S1074-7613(02)00324-2.
- 1152 62. Hume DA, Ross IL, Himes SR, Sasmono RT, Wells CA, Ravasi T. The mononuclear  
1153 phagocyte system revisited. *Journal of Leukocyte Biology.* 2002;72(4):621-7.
- 1154 63. Moestrup SK, Moller HJ. CD163: a regulated hemoglobin scavenger receptor with a  
1155 role in the anti-inflammatory response. *Annals of Medicine.* 2004;36(5):347-54.
- 1156 64. Bain CC, Mowat AM. Intestinal macrophages – specialised adaptation to a unique  
1157 environment. *European Journal of Immunology.* 2011;41(9):2494-8. doi:  
1158 10.1002/eji.201141714.
- 1159 65. Vogt L, Schmitz N, Kurrer MO, Bauer M, Hinton HI, Behnke S, et al. VSIG4, a B7  
1160 family-related protein, is a negative regulator of T cell activation. *Journal of Clinical*  
1161 *Investigation.* 2006;116(10):2817-26. doi: 10.1172/JCI25673.
- 1162 66. Luo L, Bokil NJ, Wall AA, Kapetanovic R, Lansdaal NM, Marceline F, et al. SCIMP  
1163 is a transmembrane non-TIR TLR adaptor that promotes proinflammatory cytokine  
1164 production from macrophages. *Nature Communications.* 2017;8:14133. doi:  
1165 10.1038/ncomms14133.
- 1166 67. Bonifer C, Hume DA. The transcriptional regulation of the Colony-Stimulating Factor  
1167 1 Receptor (csf1r) gene during hematopoiesis *Frontiers in Bioscience.* 2008;(13):549-60.

- 1168 68. Hume DA, Yue X, Ross IL, Favot P, Lichanska A, Ostrowski MC. Regulation of  
1169 CSF-1 receptor expression. *Molecular Reproduction and Development*. 1997;46(1):46-53.  
1170 doi: 10.1002/(SICI)1098-2795(199701)46:1<46::AID-MRD8>3.0.CO;2-R.
- 1171 69. Uhlén M, Fagerberg L, Hallström BM, Lindskog C, Oksvold P, Mardinoglu A, et al.  
1172 Tissue-based map of the human proteome. *Science*. 2015;347(6220). doi:  
1173 10.1126/science.1260419.
- 1174 70. Wu C, Jin X, Tsueng G, Afrasiabi C, Su AI. BioGPS: building your own mash-up of  
1175 gene annotations and expression profiles. *Nucleic Acids Research*. 2016;44(D1):D313-D6.  
1176 doi: 10.1093/nar/gkv1104.
- 1177 71. Djureinovic D, Fagerberg L, Hallström B, Danielsson A, Lindskog C, Uhlén M, et al.  
1178 The human testis-specific proteome defined by transcriptomics and antibody-based profiling.  
1179 *MHR: Basic science of reproductive medicine*. 2014;20(6):476-88. doi:  
1180 10.1093/molehr/gau018.
- 1181 72. Yu NY-L, Hallström BM, Fagerberg L, Ponten F, Kawaji H, Caminci P, et al.  
1182 Complementing tissue characterization by integrating transcriptome profiling from the  
1183 Human Protein Atlas and from the FANTOM5 consortium. *Nucleic Acids Research*.  
1184 2015;43(14):6787-98. doi: 10.1093/nar/gkv608.
- 1185 73. Baillet A, Le Bouffant R, Volf JN, Luangpraseuth A, Poumerol E, Thépot D, et al.  
1186 TOPAZ1, a Novel Germ Cell-Specific Expressed Gene Conserved during Evolution across  
1187 Vertebrates. *PLoS ONE*. 2011;6(11):e26950. doi: 10.1371/journal.pone.0026950.
- 1188 74. Olesen C, Larsen NJ, Byskov AG, Harboe TL, Tommerup N. Human FATE is a  
1189 novel X-linked gene expressed in fetal and adult testis. *Molecular and Cellular*  
1190 *Endocrinology*. 2001;184(1-2):25-32. doi: doi.org/10.1016/S0303-7207(01)00666-9.

- 1191 75. Osaki E, Nishina Y, Inazawa J, Copeland NG, Gilbert DJ, Jenkins NA, et al.  
1192 Identification of a novel Sry-related gene and its germ cell-specific expression. *Nucleic Acids*  
1193 *Research*. 1999;27(12):2503-10.
- 1194 76. Calloni R, Cordero EAA, Henriques JAP, Bonatto D. Reviewing and Updating the  
1195 Major Molecular Markers for Stem Cells. *Stem Cells and Development*. 2013;22(9):1455-76.  
1196 doi: 10.1089/scd.2012.0637.
- 1197 77. Kehler J, Tolkunova E, Koschorz B, Pesce M, Gentile L, Boiani M, et al. Oct4 is  
1198 required for primordial germ cell survival. *EMBO reports*. 2004;5(11):1078-83. doi:  
1199 10.1038/sj.embor.7400279.
- 1200 78. Juengel JL, Bodensteiner KJ, Heath DA, Hudson NL, Moeller CL, Smith P, et al.  
1201 Physiology of GDF9 and BMP15 signalling molecules. *Animal Reproduction Science*.  
1202 2004;82–83:447-60. doi: doi.org/10.1016/j.anireprosci.2004.04.021.
- 1203 79. McNatty KP, Juengel JL, Wilson T, Galloway SM, Davis GH. Genetic mutations  
1204 influencing ovulation rate in sheep. *Reproduction, Fertility and Development*.  
1205 2002;13(8):549-55.
- 1206 80. Davis GH. Major genes affecting ovulation rate in sheep. *Genetics Selection*  
1207 *Evolution : GSE*. 2005;37(Suppl 1):S11-S23. doi: 10.1186/1297-9686-37-S1-S11.
- 1208 81. Palomera CL, Morales RAA. Genes with major effect on fertility in sheep. *Revista*  
1209 *Mexicana de Ciencias Pecuarias*. 2014;5(1):107-30.
- 1210 82. Davis GH. Fecundity genes in sheep. *Animal Reproduction Science*. 2004;82:247-53.  
1211 doi: <http://dx.doi.org/10.1016/j.anireprosci.2004.04.001>.
- 1212 83. Imahara SD, Jelacic S, Junker CE, O'Keefe GE. The influence of gender on human  
1213 innate immunity. *Surgery*. 2005;138(2):275-82. doi: doi.org/10.1016/j.surg.2005.03.020.
- 1214 84. Marriott I, Huet-Hudson YM. Sexual dimorphism in innate immune responses to  
1215 infectious organisms. *Immunologic Research*. 2006;34(3):177-92. doi: 10.1385/IR:34:3:177.

- 1216 85. Everhardt Queen A, Moerdyk-Schauwecker M, McKee LM, Leamy LJ, Huet YM.  
1217 Differential Expression of Inflammatory Cytokines and Stress Genes in Male and Female  
1218 Mice in Response to a Lipopolysaccharide Challenge. *PLoS ONE*. 2016;11(4):e0152289.  
1219 doi: 10.1371/journal.pone.0152289.
- 1220 86. Lamason R, Zhao P, Rawat R, Davis A, Hall JC, Chae JJ, et al. Sexual dimorphism in  
1221 immune response genes as a function of puberty. *BMC Immunology*. 2006;7(1):2. doi:  
1222 10.1186/1471-2172-7-2.
- 1223 87. Forde N, Maillo V, O'Gaora P, Simintiras CA, Sturmey RG, Ealy AD, et al. Sexually  
1224 Dimorphic Gene Expression in Bovine Conceptuses at the Initiation of Implantation. *Biology*  
1225 of Reproduction. 2016;95(4):92, 1-8-, 1-8. doi: 10.1095/biolreprod.116.139857.
- 1226 88. Bermejo-Alvarez P, Rizos D, Rath D, Lonergan P, Gutierrez-Adan A. Sex determines  
1227 the expression level of one third of the actively expressed genes in bovine blastocysts. *Proc*  
1228 *Natl Acad Sci USA*. 2010;107. doi: 10.1073/pnas.0913843107.
- 1229 89. Mentzel CMJ, Anthon C, Jacobsen MJ, Karlskov-Mortensen P, Bruun CS, Jørgensen  
1230 CB, et al. Gender and Obesity Specific MicroRNA Expression in Adipose Tissue from Lean  
1231 and Obese Pigs. *PLoS ONE*. 2015;10(7):e0131650. doi: 10.1371/journal.pone.0131650.
- 1232 90. Zhang J, Zhou C, Ma J, Chen L, Jiang A, Zhu L, et al. Breed, sex and anatomical  
1233 location-specific gene expression profiling of the porcine skeletal muscles. *BMC Genetics*.  
1234 2013;14(1):53. doi: 10.1186/1471-2156-14-53.
- 1235 91. Wood Shona H, Christian Helen C, Miedzinska K, Saer Ben RC, Johnson M, Paton  
1236 B, et al. Binary Switching of Calendar Cells in the Pituitary Defines the Phase of the  
1237 Circannual Cycle in Mammals. *Current Biology*. 2015;25(20):2651-62. doi:  
1238 doi.org/10.1016/j.cub.2015.09.014.

- 1239 92. Bjelobaba I, Janjic MM, Kucka M, Stojilkovic SS. Cell Type-Specific Sexual  
1240 Dimorphism in Rat Pituitary Gene Expression During Maturation. *Biology of Reproduction*.  
1241 2015;93(1):21. doi: 10.1095/biolreprod.115.129320.
- 1242 93. Oidovsambuu O, Nyamsuren G, Liu S, Göring W, Engel W, Adham IM. Adhesion  
1243 Protein VSIG1 Is Required for the Proper Differentiation of Glandular Gastric Epithelia.  
1244 *PLoS ONE*. 2011;6(10):e25908. doi: 10.1371/journal.pone.0025908.
- 1245 94. Ellegren H, Parsch J. The evolution of sex-biased genes and sex-biased gene  
1246 expression. *Nat Rev Genet*. 2007;8(9):689-98. doi: 10.1038/nrg2167.
- 1247 95. Gillespie JR, Flanders F. *Modern Livestock & Poultry Production*. 8th Edition ed:  
1248 Delmar; 2009.
- 1249 96. Zonabend König E, Ojango JMK, Audho J, Mirkena T, Strandberg E, Okeyo AM, et  
1250 al. Live weight, conformation, carcass traits and economic values of ram lambs of Red  
1251 Maasai and Dorper sheep and their crosses. *Tropical Animal Health and Production*.  
1252 2017;49(1):121-9. doi: 10.1007/s11250-016-1168-5.
- 1253 97. Zonabend König E, Strandberg E, Ojango JMK, Mirkena T, Okeyo AM, Philipsson J.  
1254 Purebreeding of Red Maasai and crossbreeding with Dorper sheep in different environments  
1255 in Kenya. *Journal of Animal Breeding and Genetics*. 2017:n/a-n/a. doi: 10.1111/jbg.12260.
- 1256 98. Rashid MM, Runci A, Polletta L, Carnevale I, Morgante E, Foglio E, et al. Muscle  
1257 LIM protein/CSRP3: a mechanosensor with a role in autophagy. *Cell Death Discovery*.  
1258 2015;1:15014. doi: doi.org/10.1038/cddiscovery.2015.14.
- 1259 99. Jan AT, Lee EJ, Choi I. Fibromodulin: A regulatory molecule maintaining cellular  
1260 architecture for normal cellular function. *Int J Biochem Cell Biol*. 2016;80:66-70. Epub  
1261 2016/10/04. doi: 10.1016/j.biocel.2016.09.023.

- 1262 100. Funderburgh JL, Mann MM, Funderburgh ML. Keratocyte Phenotype Mediates  
1263 Proteoglycan Structure: A Role for Fibroblasts in Corneal Fibrosis. *The Journal of Biological*  
1264 *Chemistry*. 2003;278(46):45629-37. doi: 10.1074/jbc.M303292200.
- 1265 101. Hadler-Olsen E, Solli AI, Hafstad A, Winberg JO, Uhlin-Hansen L. Intracellular  
1266 MMP-2 activity in skeletal muscle is associated with type II fibers. *J Cell Physiol*.  
1267 2015;230(1):160-9. Epub 2014/06/07. doi: 10.1002/jcp.24694.
- 1268 102. Beard NA, Laver DR, Dulhunty AF. Calsequestrin and the calcium release channel of  
1269 skeletal and cardiac muscle. *Prog Biophys Mol Biol*. 2004;85(1):33-69. Epub 2004/03/31.  
1270 doi: 10.1016/j.pbiomolbio.2003.07.001.
- 1271 103. Tellam RL, Cockett NE, Vuocolo T, Bidwell CA. Genes Contributing to Genetic  
1272 Variation of Muscling in Sheep. *Frontiers in Genetics*. 2012;3:164. doi:  
1273 10.3389/fgene.2012.00164.
- 1274 104. Miar Y, Salehi A, Kolbehdari D, Aleyasin SA. Application of myostatin in sheep  
1275 breeding programs: A review. *Molecular Biology Research Communications*. 2014;3(1):33-  
1276 43.
- 1277 105. Cassar-Malek I, Passelaigue F, Bernard C, Léger J, Hocquette J-F. Target genes of  
1278 myostatin loss-of-function in muscles of late bovine fetuses. *BMC Genomics*. 2007;8:63. doi:  
1279 DOI: 10.1186/1471-2164-8-63.
- 1280 106. Wang M, Yu H, Kim YS, Bidwell CA, Kuang S. Myostatin facilitates slow and  
1281 inhibits fast myosin heavy chain expression during myogenic differentiation. *Biochemical*  
1282 *and Biophysical Research Communications*. 2012;426(1):83-8. doi:  
1283 doi.org/10.1016/j.bbrc.2012.08.040.
- 1284 107. Allen DL, Loh AS. Posttranscriptional mechanisms involving microRNA-27a and b  
1285 contribute to fast-specific and glucocorticoid-mediated myostatin expression in skeletal

- 1286 muscle. *American Journal of Physiology - Cell Physiology*. 2011;300(1):C124-C37. doi:  
1287 10.1152/ajpcell.00142.2010.
- 1288 108. Mosca B, Eckhardt J, Bergamelli L, Treves S, Bongianino R, De Negri M, et al. Role  
1289 of the JP45-Calsequestrin Complex on Calcium Entry in Slow Twitch Skeletal Muscles.  
1290 *Journal of Biological Chemistry*. 2016;291(28):14555-65. doi: 10.1074/jbc.M115.709071.
- 1291 109. Moran CM, Garriock RJ, Miller MK, Heimark RL, Mudry RE, Gregorio CC, et al.  
1292 Expression of the fast twitch troponin complex, fTnT, fTnI and fTnC, in vascular smooth  
1293 muscle. *Cell motility and the cytoskeleton*. 2008;65(8):652-61. doi: 10.1002/cm.20291.
- 1294 110. Odermatt A, Becker S, Khanna VK, Kurzydowski K, Leisner E, Pette D, et al.  
1295 Sarcolipin Regulates the Activity of SERCA1, the Fast-twitch Skeletal Muscle Sarcoplasmic  
1296 Reticulum Ca<sup>2+</sup>-ATPase. *Journal of Biological Chemistry*. 1998;273(20):12360-9. doi:  
1297 10.1074/jbc.273.20.12360.
- 1298 111. Joo ST, Kim GD, Hwang YH, Ryu YC. Control of fresh meat quality through  
1299 manipulation of muscle fiber characteristics. *Meat Science*. 2013;95(4):828-36. doi:  
1300 doi.org/10.1016/j.meatsci.2013.04.044.
- 1301 112. Goel M, Sienkiewicz AE, Picciani R, Wang J, Lee RK, Bhattacharya SK. Cochlin,  
1302 Intraocular Pressure Regulation and Mechanosensing. *PLoS ONE*. 2012;7(4):e34309. doi:  
1303 10.1371/journal.pone.0034309.
- 1304 113. Seidenbecher CI, Smalla KH, Fischer N, Gundelfinger ED, Kreutz MR. Brevican  
1305 isoforms associate with neural membranes. *J Neurochem*. 2002;83(3):738-46.
- 1306 114. Yamaguchi Y. Brevican: a major proteoglycan in adult brain. *Perspect Dev*  
1307 *Neurobiol*. 1996;3(4):307-17.
- 1308 115. Holz A, Schwab ME. Developmental expression of the myelin gene MOBP in the rat  
1309 nervous system. *J Neurocytol*. 1997;26(7):467-77.



- 1310 116. Yoshikawa F, Sato Y, Tohyama K, Akagi T, Hashikawa T, Nagakura-Takagi Y, et al.  
1311 Opalin, a Transmembrane Sialylglycoprotein Located in the Central Nervous System Myelin  
1312 Paranodal Loop Membrane. *The Journal of Biological Chemistry*. 2008;283(30):20830-40.  
1313 doi: 10.1074/jbc.M801314200.
- 1314 117. Boggs JM. Myelin basic protein: a multifunctional protein. *Cellular and Molecular*  
1315 *Life Sciences*. 2006;63(17):1945-61. doi: 10.1007/s00018-006-6094-7.
- 1316 118. Dwyer CM, Lawrence AB, Brown HE, Simm G. Effect of ewe and lamb genotype on  
1317 gestation length, lambing ease and neonatal behaviour of lambs. *Reprod Fertil Dev*  
1318 1996;8(8):1123-9.
- 1319 119. McCloskey E, McAdam JH. Grazing patterns and habitat selection of the Scottish  
1320 Blackface compared with a crossbred, using GPS Satellite telemetry collars. *Advances in*  
1321 *Animal Biosciences*. 2010;1(1):171. doi: 10.1017/S2040470010003146.
- 1322 120. Wu C, MacLeod I, Su AI. BioGPS and MyGene.info: organizing online, gene-centric  
1323 information. *Nucleic Acids Research*. 2013;41(D1):D561-D5. doi: 10.1093/nar/gks1114.
- 1324 121. Wu C, Orozco C, Boyer J, Leglise M, Goodale J, Batalov S, et al. BioGPS: an  
1325 extensible and customizable portal for querying and organizing gene annotation resources.  
1326 *Genome Biology*. 2009;10(11):R130. doi: 10.1186/gb-2009-10-11-r130.
- 1327 122. Kim D, Langmead B, Salzberg SL. HISAT: a fast spliced aligner with low memory  
1328 requirements. *Nat Meth*. 2015;12(4):357-60. doi: doi.org/10.1038/nmeth.3317.
- 1329 123. Perteau M, Perteau GM, Antonescu CM, Chang T-C, Mendell JT, Salzberg SL.  
1330 StringTie enables improved reconstruction of a transcriptome from RNA-seq reads. *Nat*  
1331 *Biotech*. 2015;33(3):290-5. doi: doi.org/10.1038/nbt.3122.
- 1332 124. Miao X, Luo Q, Qin X. Genome-wide analysis reveals the differential regulations of  
1333 mRNAs and miRNAs in Dorset and Small Tail Han sheep muscles. *Gene*. 2015;562(2):188-  
1334 96. doi: doi.org/10.1016/j.gene.2015.02.070.

- 1335 125. Suárez-Vega A, Gutiérrez-Gil B, Klopp C, Tosser-Klopp G, Arranz JJ. Variant  
1336 discovery in the sheep milk transcriptome using RNA sequencing. *BMC Genomics*.  
1337 2017;18(1):170. doi: 10.1186/s12864-017-3581-1.
- 1338 126. Sun L, Bai M, Xiang L, Zhang G, Ma W, Jiang H. Comparative transcriptome  
1339 profiling of longissimus muscle tissues from Qianhua Mutton Merino and Small Tail Han  
1340 sheep. *Scientific Reports*. 2016;6:33586. doi: doi.org/10.1038/srep33586.
- 1341 127. Peñagaricano F, Valente BD, Steibel JP, Bates RO, Ernst CW, Khatib H, et al.  
1342 Searching for causal networks involving latent variables in complex traits: Application to  
1343 growth, carcass, and meat quality traits in pigs. *Journal of Animal Science*.  
1344 2015;93(10):4617-23. doi: 10.2527/jas.2015-9213.
- 1345 128. Van Laere A-S, Nguyen M, Braunschweig M, Nezer C, Collette C, Moreau L, et al. A  
1346 regulatory mutation in IGF2 causes a major QTL effect on muscle growth in the pig. *Nature*.  
1347 2003;425(6960):832-6. doi: doi.org/10.1038/nature02064.
- 1348 129. Banos G, Bramis G, Bush SJ, Clark EL, McCulloch MEB, Smith J, et al. The  
1349 genomic architecture of mastitis resistance in dairy sheep. 2017;Under Review.
- 1350 130. Suárez-Vega A, Gutiérrez-Gil B, Klopp C, Tosser-Klopp G, Arranz J-J.  
1351 Comprehensive RNA-Seq profiling to evaluate lactating sheep mammary gland  
1352 transcriptome. *Scientific Data*. 2016;3:160051. doi: doi.org/10.1038/sdata.2016.51.
- 1353 131. Kapetanovic R, Fairbairn L, Beraldi D, Sester DP, Archibald AL, Tuggle CK, et al.  
1354 Pig bone marrow-derived macrophages resemble human macrophages in their response to  
1355 bacterial lipopolysaccharide. *J Immunol*. 2012;188. doi: 10.4049/jimmunol.1102649.
- 1356 132. Fairbairn L, Kapetanovic R, Beraldi D, Sester DP, Tuggle CK, Archibald AL, et al.  
1357 Comparative Analysis of Monocyte Subsets in the Pig. *The Journal of Immunology*.  
1358 2013;190(12):6389-96. doi: 10.4049/jimmunol.1300365.

- 1359 133. Montgomery GW, Sise JA. Extraction of DNA from sheep white blood cells. New  
1360 Zealand Journal of Agricultural Research. 1990;33(3):437-41. doi:  
1361 10.1080/00288233.1990.10428440.
- 1362 134. Pervouchine DD, Djebali S, Breschi A, Davis CA, Barja PP, Dobin A, et al.  
1363 Enhanced transcriptome maps from multiple mouse tissues reveal evolutionary constraint in  
1364 gene expression. Nat Commun. 2015;6. doi: 10.1038/ncomms6903.
- 1365 135. Chitwood J, Rincon G, Kaiser G, Medrano J, Ross P. RNA-seq analysis of single  
1366 bovine blastocysts. BMC Genomics. 2013;14(1):350. doi: 10.1186/1471-2164-14-350.
- 1367 136. Martherus RS, Sluiter W, Timmer ED, VanHerle SJ, Smeets HJ, Ayoubi TA.  
1368 Functional annotation of heart enriched mitochondrial genes GBAS and CHCHD10 through  
1369 guilt by association. Biochem Biophys Res Commun. 2010;402. doi:  
1370 10.1016/j.bbrc.2010.09.109.
- 1371 137. Alexa A, Rahnenfuhrer J. topGO: Enrichment analysis for Gene Ontology 2010.  
1372 Available from: <http://www.bioconductor.org/packages/release/bioc/html/topGO.html>.
- 1373 138. Fagerberg L, Hallström BM, Oksvold P, Kampf C, Djureinovic D, Odeberg J, et al.  
1374 Analysis of the Human Tissue-specific Expression by Genome-wide Integration of  
1375 Transcriptomics and Antibody-based Proteomics. Molecular & Cellular Proteomics.  
1376 2014;13(2):397-406. doi: 10.1074/mcp.M113.035600.
- 1377 139. Lein ES, Hawrylycz MJ, Ao N, Ayres M, Bensinger A, Bernard A, et al. Genome-  
1378 wide atlas of gene expression in the adult mouse brain. Nature. 2007;445(7124):168-76. doi:  
1379 doi.org/10.1038/nature05453.
- 1380 140. Siddiqui AS, Khattra J, Delaney AD, Zhao Y, Astell C, Asano J, et al. A mouse atlas  
1381 of gene expression: Large-scale digital gene-expression profiles from precisely defined  
1382 developing C57BL/6J mouse tissues and cells. Proc Natl Acad Sci USA.  
1383 2005;102(51):18485-90. doi: 10.1073/pnas.0509455102.

1384 141. Kumar S, Stecher G, Tamura K. MEGA7: Molecular Evolutionary Genetics Analysis  
1385 Version 7.0 for Bigger Datasets. *Molecular Biology and Evolution*. 2016;33(7):1870-4. doi:  
1386 10.1093/molbev/msw054.

1387 142. Rambaut A. FigTree v1.4.0 2016 [16th March 2017]. v1.4.3:[Available from:  
1388 <http://tree.bio.ed.ac.uk/software/figtree/>.

1389

1390 **Fig 1: Hierarchical clustering of the samples included in the sheep gene expression atlas**

1391 **dataset.** Samples of each tissue and cell type from each breed and developmental stage were  
1392 averaged across individuals for ease of visualisation. The tree was constructed from the  
1393 Euclidean distances between expression vectors using MEGA v7.0.14 [141] with the  
1394 neighbour-joining method and edited in the graphical viewer FigTree v1.4.3 [142]. Clustering  
1395 is biologically meaningful and highlights the lack of any significant effect of library type  
1396 post-correction. Samples are coloured by organ system.

1397

1398 **Fig 2: Network visualisation and clustering of the sheep gene expression atlas.** A three-

1399 dimensional visualisation of a Pearson correlation gene-to-gene graph of expression levels  
1400 derived from RNA-Seq data from analysis of sheep tissues and cells. Each node (sphere) in  
1401 the graph represents a gene and the edges (lines) correspond to correlations between  
1402 individual measurements above the defined threshold. The graph is comprised of 15,192  
1403 nodes (genes) and 811,213 edges (correlations  $\geq 0.75$ ). Co-expressed genes form highly  
1404 connected complex clusters within the graph. Genes were assigned to groups according to  
1405 their level of co-expression using the MCL algorithm.

1406

1407 **Fig 3: Collapsed node visualisation of the sheep gene expression atlas dataset in two-**

1408 **dimensions to illustrate the relative proportion of genes in each cluster.** Includes 3104

1409 nodes and 138,407 edges with a Pearson correlation value of  $r=0.75$  and an MCL inflation  
1410 (MCLi) value of 2.2. Nodes are coloured by tissue/cell type or for broader classes organ  
1411 system. The largest clusters are numbered from 1 to 30 (see Table 3 for functional  
1412 annotation). The largest clusters are dominated by either house-keeping genes (1 & 4) or  
1413 genes associated with transcriptionally rich tissues or cell types, such as brain (2), testes (3)  
1414 and macrophages (5).

1415

1416 **Fig 4: Interrogation of the underlying expression profiles allows regions of the graph to**  
1417 **be associated with specific tissues or cell types. A** A three-dimensional visualisation of a  
1418 Pearson correlation gene to gene network graph ( $r=0.75$ , MCLi=2.2). Samples of each tissue  
1419 and cell type from each breed and developmental stage are averaged across individuals for  
1420 ease of visualisation. Histograms of the averaged expression profile (averaged across  
1421 individuals for each tissue and cell type for ease of visualisation) of genes in selected clusters  
1422 are given on the right: **B (i)** profile of cluster 5 genes whose expression is highest in  
1423 macrophages; **(ii)** profile of cluster 7 genes whose expression is highest in fetal ovary and  
1424 testes; **(iii)** or a broader expression pattern associated with a cellular process e.g. oxidative  
1425 phosphorylation (cluster 15). Note that there may be a degree of variation in the expression  
1426 pattern of individual genes within a cluster which is masked when average profiles are  
1427 displayed.

1428

1429 **Fig 5: Upregulation of genes in the crossbred BFxT relative to the purebred Texel. A** A  
1430 Texel sire was crossed with Scottish Blackface dam to create the F1 Texel x Scottish  
1431 Blackface individuals. **B** The top 20 genes showing the greatest up-regulation (as absolute  
1432 fold change) between the crossbred BFxT and purebred Texel individuals. Genes associated  
1433 with the function of skeletal muscle and connective tissue are indicated.

1434

1435 **Fig 6: Screenshot of the representation of the profile of the sheep *GDF-8 (MSTN)* gene**  
1436 **within the BioGPS online portal.** All data from the BFXT sheep gene expression atlas  
1437 dataset are available through the BioGPS database  
1438 ([http://biogps.org/dataset/BDS\\_00015/sheep-atlas/](http://biogps.org/dataset/BDS_00015/sheep-atlas/)). This provides a searchable database of  
1439 genes, with expression profiles across tissues and cells for each gene displayed as histograms  
1440 via the following link, <http://biogps.org/sheepatlas/>. Samples are coloured according to organ  
1441 system, for example, Immune, GI Tract etc. The BioGPS platform supports searching for  
1442 genes with a similar profile, allows access to the raw data, and links to external resources. It  
1443 also provides the potential for comparative analysis across species, for example with the  
1444 expression profiles for pig.

1445

## 1446 **Supplemental Material**

1447

1448 **S1 Fig: Principal component analysis with all samples plotted in two dimensions using**  
1449 **their projections onto the first two principal components.** For each sample, each gene's  
1450 expression level is taken as the mean TPM across all replicates, before (A) and after (B) any  
1451 batch effect correction. Samples are coloured by organ system. Ellipses indicate confidence  
1452 intervals of 95%. The shape of each point indicates each sample's library type: mRNA-seq  
1453 (circle) or total RNA-seq (triangle). Blastocyst samples are excluded for clarity as they are  
1454 generated using a different experimental protocol. Before correction, points can be  
1455 partitioned by shape (to the left and right of sub-Fig A), suggesting a batch effect – variation  
1456 introduced by library type confounds variation by tissue type. After correction (sub-Fig  
1457 B), there is no notable axis of variation that partitions points by shape – consequently,

1458 variation introduced by library type (a batch effect) does not confound variation by tissue  
1459 type (which is biologically meaningful).

1460

1461 **S2 Fig: Sample-to-sample network graph analysis was used to validate the samples**  
1462 **included in the sheep gene expression atlas dataset.** Each node represents a sample and  
1463 each edge its connectivity to other samples in the dataset. A correlation of  $r=0.75$  split the  
1464 graph into 10 different clusters. The largest cluster (cluster 1) included the majority of  
1465 samples ('mixed tissues'), most of which were transcriptionally similar, while the remainder  
1466 of the clusters comprised samples with distinctive transcriptional signatures such as  
1467 macrophages (3) and abomasum. Spurious samples were easily identified if they were present  
1468 in a cluster comprised of samples from a different tissue or cell type. Pearson Correlation  
1469  $r=0.75$ , MCLi = 2.2, nodes = 481 and edges = 23,903.

1470

1471 **S1 Methods:** Additional Methods

1472

1473 **S1 Dataset:** Gene Expression Level Atlas as transcripts per million (unaveraged)

1474 **S2 Dataset:** Gene Expression Level Atlas as transcripts per million (averaged across  
1475 biological replicates for each developmental stage)

1476 **S3 Dataset:** Sex-biased Expression Atlas (based on expression estimates from 3 adult male  
1477 and 3 adult female BFXT sheep)

1478

1479 **S1 Table:** Overview of animals used to generate the sheep atlas tissue subsets.

1480 **S2 Table:** Details of library type and tissue/cell samples used in each subset of samples.

1481 **S3 Table:** Number of reads, and number of aligned reads, per sample.

1482 **S4 Table:** Genes undetected (TPM < 1) in every tissue/cell line of the expression atlas.

- 1483 **S5 Table:** Quality categories for automated gene annotations.
- 1484 **S6 Table:** Proportion of unannotated protein-coding genes assigned probable gene names.
- 1485 **S7 Table:** Source of ruminant proteome data.
- 1486 **S8 Table:** Candidate gene names for unannotated Oar v3.1 protein-coding genes: shortlist.
- 1487 **S9 Table:** Candidate gene names for unannotated Oar v3.1 protein-coding genes: longlist.
- 1488 **S10 Table:** Candidate gene descriptions for all unannotated Oar v3.1. protein-coding genes
- 1489 (potentially informative in the absence of a gene name).
- 1490 **S11 Table:** Genes within each co-expression cluster.
- 1491 **S12 Table:** GO term enrichment for co-expression clusters 1 to 50.
- 1492 **S13 Table:** Manual annotation of cluster 15 (genes involved in oxidative phosphorylation).
- 1493 **S14 Table:** Manual annotation of unannotated genes in cluster 12 (genes with a T-cell
- 1494 signature).
- 1495 **S15 Table:** Manual annotation of unannotated genes in cluster 5 (genes with an alveolar
- 1496 macrophage signature).
- 1497 **S16 Table:** Genes with five-fold sex-biased expression in at least one BFxT tissue.
- 1498 **S17 Table:** GO term enrichment for the set of genes with five-fold sex-biased expression in
- 1499 at least one BFxT tissue.
- 1500 **S18 Table:** Fold changes in expression level between BFxT and Texel sheep.
- 1501 **S19 Table:** GO term enrichment for the set of genes differentially expressed between BFxT
- 1502 and Texel sheep.
- 1503 **S20 Table:** Number of genes with detectable expression, per tissue.
- 1504 **S21 Table:** Coding potential of putative novel CDS.
- 1505 **S22 Table:** Number of genes with detectable expression, per gene type.
- 1506 **S23 Table:** Proportion of Oar v3.1 gene, exon and transcript models in the StringTie
- 1507 assembly.



1508 **S24 Table:** Novel transcript models in the StringTie assembly.

1509 **S25 Table:** Details of the additional RNA-Seq libraries included from Texel sheep [18].

1510

1511

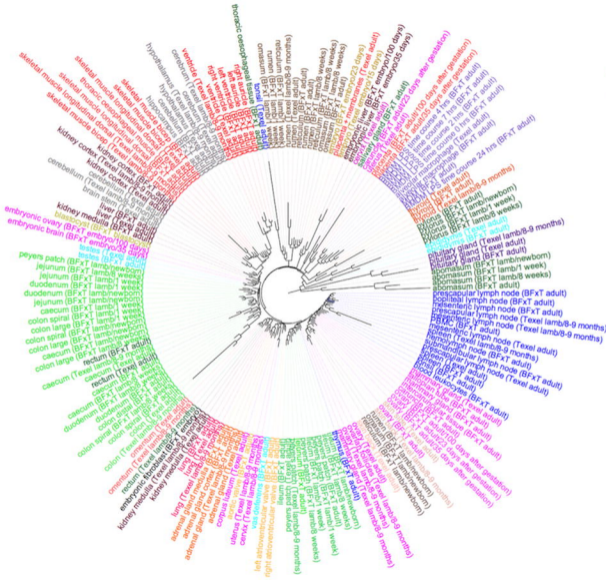

- Male Reproductive
- Female Reproductive
- Immune
- GI Tract (Small/Large Intestine)
- GI Tract (Ileum/Peyer's Patch)
- GI Tract (Rumen Complex)
- GI tract (Other)
- Endocrine
- Kidney/Liver
- Brain
- Skeletal Muscle/Heart
- Heart Valves
- Skin
- Omentum
- Embryo/Blastocysts
- Pituitary Gland
- Embryonic Fibroblasts
- Macrophages
- Placenta
- Lung

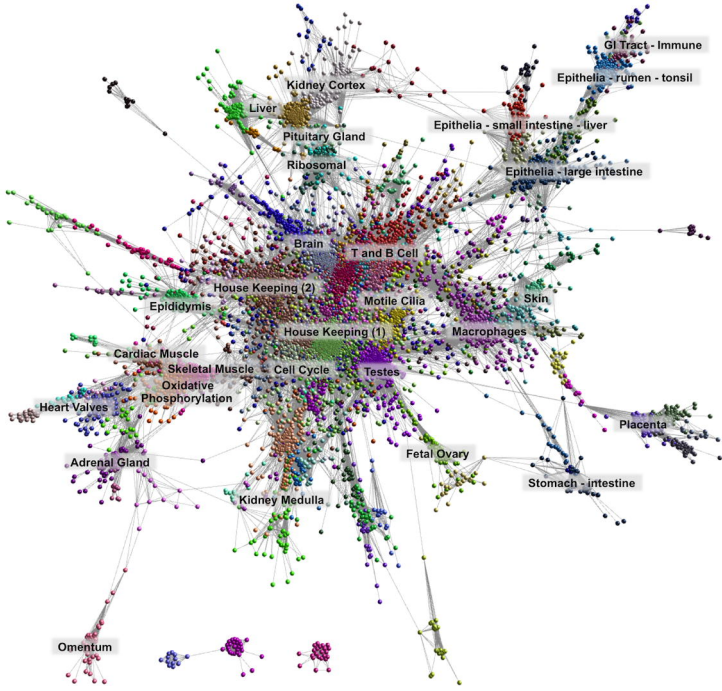

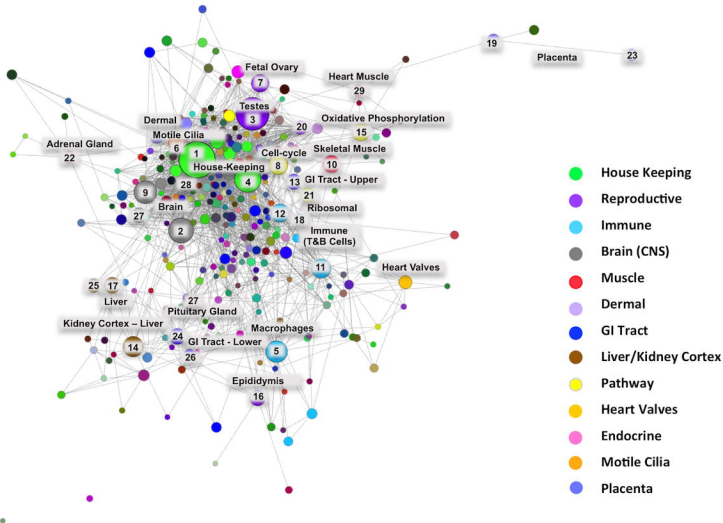

A

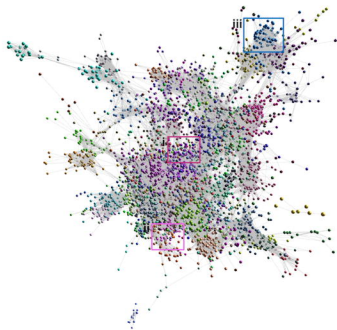

Gene Expression Level as Transcripts per Million (TPM)

B

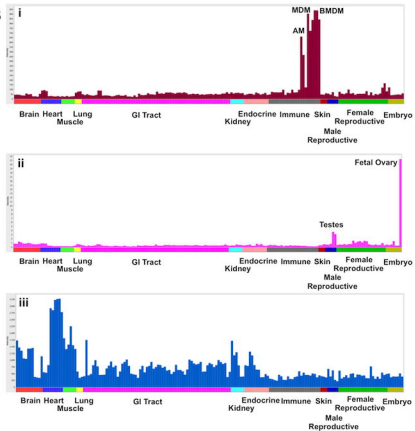

A

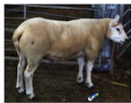

Sire - Texel

×

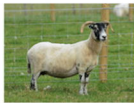

Dam - Scottish Blackface

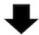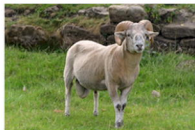F<sub>1</sub> - Scottish Blackface x Texel

B

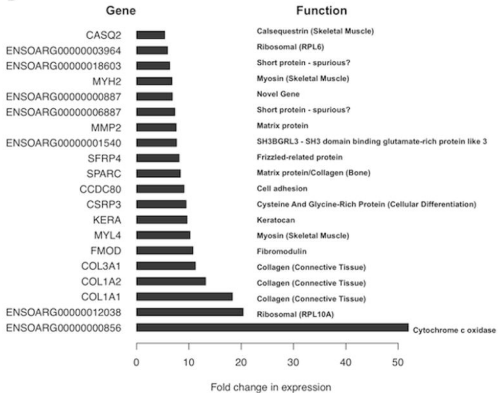

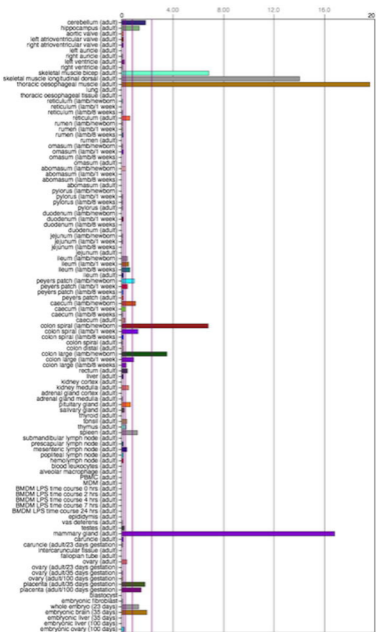

Median(0.08)  
3x30xM 30xM
